# Supplementary material
Source: Research Square preprint supplement (doi:10.21203/rs.3.rs-8894321/v1)
Supplement: Supplementary file 1 [file 71102626f1a44b07dc812c9d.xlsx]

## Sheet: ReadMe
Data for the research article: Forecast of building materials and their related environmental impacts: comparing wood-based and conventional construction pathways
Authors
Camilla Ernst Andersen1, Rasmus Nøddegaard Hansen1,*, Endrit Hoxha1, Harpa Birgisdóttir1
1 Department of the Built Environment, Aalborg University, Copenhagen, Denmark
* Corresponding author details, Rasmus Nøddegaard Hansen. Email: rnh@build.aau.dk. Telephone number: 004599402315. Postal address: A.C. Meyers Vaenge 15, DK-2450 Copenhagen, Denmark
1. This file contains data used for the figures 1 and 3-8 in the research article: Forecast of building materials and their related environmental impacts: comparing wood-based and conventional construction pathways
2. Each of the relevant figures have a relevant sheet in this document.
3. Data in this file must only be used with appropriate reference to the authors of this data and the related research article.

## Sheet: F1. Area forecast
Figure 1 - Historical data on constructed building typologies and forecasted area for 2025 to 2050 based on forecasting by Hoxha et al. (2024). Note that the scale of the y-axis varies with the building typology
Data	Year	Farm houses	Detached houses	Terraced, linked or semi-detached houses	Multi-dwelling houses	Student hostels	Residential buildings for communities	Other residential building	Non-residential farm buildings	Factories, workshops	Power stations, gaswork	Other building used for production	Transportation or garage	Office, trade, public administration	Hotel, restaurant, hair dresser and other services	Unspecified transport and trade	Library, church, museums	Buildings for education and research	Hospitals	Day-care institutions	Non-specified welfare institutions	Weekend cottages	Unspecified holiday purposes	Sports centres, club houses	Allotment garden houses	Unspecified recreational purposes	Garage with room for one or two vehicles	Carports	Outhouses
Historical data	1982	94780	665134	816949	443942	5375	98349	4759	1257746	572427	48236	49620	112593	611363	44178	10437	83062	346795	38461	58525	21174	143144	13353	115840	1648	24389	123927	319676	103951
	1983	83014	864707	827893	411489	13709	82119	3963	1264741	522567	56320	75010	71853	509146	37316	16090	38764	289037	23040	44377	16414	158157	10112	74938	834	18051	133284	351329	111643
	1984	86933	1409476	929343	417277	11286	62898	5757	1189673	775980	43402	81301	99889	595948	39608	24916	33763	142829	19795	12172	14442	243213	4499	65789	976	16040	157345	411858	116976
	1985	103389	1232674	746586	347321	2915	44798	5708	1346961	1095279	47578	99991	107917	717744	64121	15025	21736	184283	85785	15060	10309	228878	11378	84985	2475	21912	168770	475297	127855
	1986	115653	1750017	867550	395034	13287	69506	7363	1617087	1246072	62158	113886	115318	1049532	90242	18249	47304	153798	52771	22763	16608	243072	7699	119937	1372	19546	172810	461994	115684
	1987	111809	1413330	958157	460534	15492	64532	7987	1580208	1495111	51307	130712	133341	1380465	155618	33087	38094	142492	8739	29634	10670	193769	5736	87233	466	23975	142879	390582	106852
	1988	101878	1121320	948000	455035	12170	43886	10841	1763139	1559915	52151	187021	162308	1597604	152701	27483	53705	199501	28827	44715	23806	193724	12530	138645	1938	34933	129601	353040	111910
	1989	97525	861578	971231	523745	30273	47384	14148	1616569	1198078	87359	126827	108234	1339428	148749	25855	67465	128521	81610	49837	31579	146885	13736	119200	1067	26837	110888	289184	113928
	1990	83695	613082	990887	613852	23749	61110	6684	1547636	1190920	116263	114024	83967	1120894	98848	28562	62405	146430	13810	35994	32242	151244	9062	136837	246	34147	96356	225442	110736
	1991	83772	453348	589812	583570	15306	37696	9438	1413433	942286	65656	80727	115351	1007401	71523	19997	52240	105150	36000	33820	55454	149495	5417	80449	102	31410	88299	198891	105550
	1992	76395	421887	499155	447829	19953	27719	6780	1534020	767592	111048	80205	60148	729699	84923	23993	28371	111642	71159	29137	23283	197432	9907	94652	388	26887	89460	197226	96960
	1993	65997	358417	342004	410144	17283	54318	14534	1092863	567495	114252	56205	49065	648373	54249	23369	37837	128870	7409	52085	15950	158844	11941	76471	43	37098	57499	117190	65964
	1994	59060	506028	268119	441296	19890	35318	17219	927351	540984	78862	42953	62103	594331	40256	14617	27677	127316	24401	50732	24512	165624	5884	79012	195	21634	91996	189445	87182
	1995	85860	657730	207919	443749	8421	37283	10607	1329101	822424	80963	44354	45186	677539	36480	16038	32790	155838	38189	51980	33105	185260	6360	63089	102	20786	105142	232647	96150
	1996	112759	987296	202925	396524	15820	54365	9470	1462886	875242	80676	62379	51586	789489	38306	10654	39160	150287	21465	83310	20352	189348	5117	87199	115	27105	132623	290447	115402
	1997	136207	1392967	294001	396821	19064	83695	17733	1881272	880261	81981	72084	55183	868904	42291	26473	51377	181114	57352	108873	17487	209701	5797	91132	421	24731	169204	372013	157865
	1998	145206	1556321	299644	391020	13057	80146	15764	2115564	971475	58331	88819	58744	937349	59736	42822	57833	227750	28570	98509	13041	211126	7602	99598	203	32000	167710	368650	149706
	1999	148408	1568464	347866	298697	12976	101031	11343	2179519	1082071	63486	99993	103004	1136387	71220	23557	37714	226086	44492	90945	13600	238086	5967	121858	273	32384	179178	376301	152018
	2000	120428	1228370	345748	410816	15136	102257	9303	2176502	1104572	53075	95508	115407	1069109	76758	66958	52719	234516	39643	73122	19307	222719	7216	76696	127	34327	159521	350703	167476
	2001	123372	1185702	421142	373502	14791	83686	9121	2412025	1147180	37044	95511	93950	1438092	101981	23583	50197	283073	71523	52598	40456	218516	5758	133330	718	32666	164880	325363	173568
	2002	117062	1070549	461416	464373	17478	66713	8203	1880175	862387	30663	92917	122670	1278987	82485	27571	45074	322282	44598	54747	43731	209660	11478	82000	1322	41878	142024	290472	162424
	2003	134205	1245824	660533	617653	7741	94064	18362	2191257	793394	52508	72779	52341	971838	63978	19864	30617	222571	36003	43568	35511	277786	5285	88999	1388	32306	155739	337272	184675
	2004	160557	1435280	697734	712752	21884	78434	18992	2673401	750488	36608	97277	110905	1326666	71902	19986	105757	305834	28190	53418	24352	350320	11977	160633	1420	43572	189459	379617	217273
	2005	135854	1653236	659566	761604	43838	85487	15410	1971131	607809	35042	72476	125361	1057168	54205	40102	37887	261677	27088	44643	26622	438987	12171	125785	1687	36032	185712	375516	219002
	2006	162317	1994252	695614	801870	39729	130395	15913	2414692	762537	38340	94562	101211	1209278	96566	30986	35643	241158	69248	41587	22395	436510	11725	122038	1213	36089	203319	395162	237474
	2007	158865	2174900	763247	1058523	8295	90203	12640	2046890	636621	42110	59163	102388	1363926	51938	25993	74758	158634	48752	35857	56703	403630	6468	118954	1971	39555	198810	402172	225030
	2008	192615	2163754	735413	674759	26207	69062	14459	2466631	855360	34734	70750	82711	1925307	91003	45929	81266	207101	19315	48497	37847	372076	12931	135362	2958	55804	203402	358282	224410
	2009	211370	1655297	396567	500372	20822	104536	14825	2211555	778327	45237	75095	181652	1722517	157434	22942	53464	213752	57716	61756	22175	323092	30385	121295	2709	28915	201693	303163	241968
	2010	175425	1225897	186478	284208	11872	80349	13544	1305394	370564	28549	17477	93953	1434115	110161	5417	69178	152167	62569	61407	2792	243593	9086	123905	2386	27918	176945	250470	256219
	2011	136504	1237393	260119	287130	15148	84133	11891	1062329	281020	30833	15919	99510	991442	85866	2880	24654	214770	15618	71228	4087	220272	8494	147854	2558	18098	153060	236194	254966
	2012	131547	1092163	301118	516277	37515	166187	17626	1162998	365099	56683	28486	135203	993689	45092	1659	38252	268074	59991	70111	7006	185734	8500	123960	1297	17148	149264	192181	235275
	2013	124117	1026779	289311	535200	17296	166354	12082	1263537	278133	49191	17819	86273	874245	54120	1799	35425	247429	55934	51819	5607	188059	5657	120901	1309	16857	137335	181506	252168
	2014	108140	1030022	319355	498234	8138	96938	11226	1519124	307823	67917	25852	124370	869568	68538	2551	55622	301037	105153	60491	8852	176513	7601	130743	1436	16944	130020	168705	232333
	2015	121494	1043572	348524	431517	8113	82809	11767	1184338	321487	117920	14227	122995	954433	54320	5192	26904	257137	74287	34463	5382	185804	8864	148508	1604	24536	123525	169896	235170
	2016	105303	1192556	381985	739539	29071	54033	18248	962518	297137	60364	11655	54261	792853	45128	5830	148708	276474	148268	37927	10617	167126	5162	113234	796	15232	120629	169032	235048
	2017	92542	1269458	464629	1004967	54076	46204	12865	932512	326664	75636	8344	107817	1118619	47720	2064	42521	264883	107542	39033	9982	184977	7369	104648	902	13747	156999	241128	386411
	2018	83082	1247618	559643	1199015	48461	56446	17275	832356	359924	47222	2596	156581	968567	66239	1753	35015	187275	182055	35852	4737	176301	5623	99822	903	12942	146664	249311	628735
	2019	73031	1329708	637066	1509066	58962	89561	20678	618926	330890	60435	6800	202895	1058724	118398	2865	27944	180074	63651	58288	5802	210478	8698	121046	980	13507	183611	271897	993728
	2020	70813	1377192	700053	1676116	63397	64913	14790	533180	257563	147784	1306	147849	841637	44811	168	49046	121132	69427	30683	777	215956	11679	92545	926	11279	127210	222935	605796
	2021	72771	1423431	752174	1417507	83102	80912	18739	549620	232103	79925	2780	103730	1053447	125170	108	32768	201031	36438	49106	1215	254232	6636	79846	804	14025	128402	205537	677260
Forecast	2022	112435	959664	933230	1.14444e+06	32667.4	78807.5	16240.7	816825	953316	70835.2	38001.4	108095	496414	83912.5	16374.3	60477.2	192183	115307	49127	11211.2	267513	12946.5	121756	2021.47	29005.7	160436	240210	417424
	2023	114025	724079	1.01544e+06	1.21857e+06	21736.8	51219.8	21884.9	750399	1.19197e+06	70777.6	59973.8	135106	561567	56880.7	8071.81	74519.3	136012	99301.7	52214.7	17844.4	241167	7837.63	129596	1514.71	22514.5	132466	175829	425592
	2024	130481	554955	996892	1.2217e+06	19229.2	43703	25418.4	916329	1.24639e+06	38557.4	102658	86678.2	526356	70573.8	12330.3	69741.5	183366	119658	60599.5	29934.9	234834	14136.2	121178	1287.29	29807.7	121149	111561	428549
	2025	148423	538113	1.01173e+06	1.29904e+06	28101.6	76046.1	22766.6	1.1951e+06	874167	42315.1	72192.7	95004.9	442526	40192.9	11968.8	59858.7	195747	94882.9	48291.3	38628.1	204110	30253.4	131973	1226.64	28861.5	104397	84484.2	429512
	2026	148115	682640	1.02299e+06	1.39777e+06	26217	57984.7	20968.2	1.16686e+06	856624	29203.7	53666.7	91708.4	555203	26493	3479.35	36271.8	165004	147492	17926.1	15021.3	203878	10290.8	131103	966.449	22337	91826	82293.4	427071
	2027	143833	923406	613523	1.37612e+06	18384.4	63424.2	24144.4	1.35843e+06	597605	29851.6	17633.1	79353	696713	23010.1	5162.86	46020	232444	108322	22653.9	4197.35	215440	9799.41	125373	655.709	32745.5	85730	1731.7	402225
	2028	143950	1355923	514473	1.24901e+06	29294.8	93131.4	18171.5	1.22051e+06	412526	41679.2	12498.6	91471.1	1.02603e+06	25129.2	41.3704	36142.2	265107	79468.5	32196.7	12374.9	258464	9704.07	127884	849.783	18737.1	88852	73461	429592
	2029	134309	1.44136e+06	348928	1.21995e+06	32038.2	111987	16592.3	1.16022e+06	202044	33175.8	0	86909.8	1.40141e+06	29407.3	16122.9	41537.4	256570	117822	40907.5	21198.5	244083	7175.77	109706	369.674	18252.1	58852	116137	444709
	2030	136942	1.7938e+06	266649	1.25973e+06	29254.6	115937	16734.7	1.03465e+06	196591	26578.6	0	134083	1.61892e+06	31587.4	349.394	48189.5	336775	110564	57828.3	13010.4	221490	9152.02	122072	697.093	24454	95310	173412	470110
	2031	131020	1.5643e+06	198056	1.27081e+06	47896.1	120563	20608.5	1.16388e+06	136346	60180.1	0	112613	1.44116e+06	25018.5	6264.91	60688.7	329599	87664.5	64790.1	10896.1	233425	10150.8	104826	1083.11	22867.3	110417	254452	518723
	2032	127718	1.28623e+06	184668	1.23221e+06	41910.5	103887	17681.3	731369	379375	87208.8	525.274	122659	1.25071e+06	27603.6	15353.4	67426.9	339552	116844	52786.9	5447.34	308620	6828.96	112700	1130.4	30491.3	139859	250563	516713
	2033	122054	1.04613e+06	267350	1.24114e+06	34005.9	88582.8	26846.3	574499	688289	39811.3	14096.9	134879	1.12773e+06	52409.8	5724.93	92938.1	333194	100838	52452.7	10626.3	314831	8780.46	109354	1411.57	23574.8	178401	201063	477107
	2034	159816	810544	264600	1.24396e+06	39191.3	107591	27821.5	913536	828697	79772.4	16461.5	149220	898785	78823.9	9211.44	48922.2	331080	121195	49609.4	9533.02	326619	13957.8	122953	1712.88	18205.7	178868	232191	490948
	2035	156835	641420	304428	1.16027e+06	37059.7	115720	22416.9	929174	1.06735e+06	82598.6	38433.9	153009	832684	144493	24312	44203.4	243515	96419.4	74397.2	12369.2	300273	8141.12	130792	2137.05	15824.1	192297	292194	502431
	2036	158425	624578	765117	1.31414e+06	40205.1	95094	23536.2	862748	1.12177e+06	47569.4	81118.6	187746	818953	141869	18970.5	32458.6	324290	149029	74884	6483.29	293941	14849.6	122374	3238.81	22047.3	139007	355107	519459
	2037	174881	769105	767668	1.29032e+06	29274.5	100603	21057	1.02868e+06	749548	47511.9	50652.8	146045	884106	138210	17605	58308.7	269042	109858	77971.8	6206.91	263216	15139.3	133169	2773.29	19276.7	150325	341278	513437
	2038	192823	1.00987e+06	860724	1.30473e+06	26766.9	121186	26701.2	1.30745e+06	732005	15291.6	32126.8	122547	848896	88602.3	20574.5	49380.9	260494	81005	86356.6	-372.966	262984	14332.3	132299	2045.68	24729.1	176347	269341	510754
	2039	192515	1.44239e+06	669573	1.2434e+06	35639.3	93598.6	30234.7	1.27921e+06	472986	19049.3	0	149559	765065	61570.4	12272	65274.1	204322	119358	74048.4	10975.7	274547	9223.38	126569	2832.35	34508.5	189733	231273	521962
	2040	188233	1.52783e+06	782144	1.29974e+06	33754.7	86081.8	27583	1.47078e+06	287907	5937.95	0	101131	877742	75263.5	16530.5	79316.3	251677	112101	43683.2	17608.9	317570	15521.9	129080	2325.59	28017.3	195734	166891	530129
	2041	188350	1.88027e+06	864357	1.37387e+06	25922.1	118425	25784.5	1.33285e+06	77424.8	6585.92	0	109457	1.01925e+06	44882.6	16169	74538.4	264058	89201	48411	29699.4	303190	31639.1	110902	2098.17	35310.5	167764	102623	533086
	2042	178709	1.65076e+06	845807	1.377e+06	36832.5	100364	28960.7	1.27256e+06	71971.9	18413.5	0	106161	1.34857e+06	31182.7	7679.53	64655.6	233315	118380	57953.8	38392.6	280596	11676.5	123268	2037.53	34364.3	156447	75546.7	534049
	2043	181342	1.3727e+06	860644	1.45434e+06	39576	105803	22987.9	1.147e+06	11726.9	9910.13	0	93805.6	1.72395e+06	27699.8	9363.05	41068.8	300754	102375	66664.6	14785.8	292531	11185.2	106023	1777.33	27839.8	139695	73356	531609
	2044	175420	1.13259e+06	871906	1.55307e+06	36792.4	135510	21408.6	1.27623e+06	254755	3312.93	0	105924	1.94146e+06	29819	4241.56	50817	333418	122731	83585.4	3961.88	367726	11089.8	113896	1466.59	38248.4	127124	-7205.71	506762
	2045	172118	897009	462438	1.53142e+06	55433.8	154366	21551.1	843717	563669	36914.4	0	101362	1.7637e+06	34097.1	20323.1	40939.1	324881	97955.9	90547.1	12139.4	373937	8561.52	110550	1660.67	24239.9	121028	64523.6	534129
	2046	166454	727885	363387	1.40431e+06	49448.2	158316	25424.9	686848	704077	63943.1	0	148536	1.57325e+06	36277.2	4549.58	46334.3	405085	150565	78543.9	20963.1	385725	10537.8	124149	1180.56	23754.9	124150	107200	549246
	2047	204216	711043	197842	1.37525e+06	41543.6	162942	22497.7	1.02588e+06	942731	16545.6	16894	127066	1.45027e+06	29708.3	10465.1	52986.5	397910	111395	78209.7	12775	359380	11536.6	131989	1507.97	29956.9	94150.1	164474	574648
	2048	201235	855570	115564	1.41503e+06	46729	146266	31662.7	1.04152e+06	997150	56506.7	59578.6	137111	1.22132e+06	32293.4	19553.6	65485.7	407862	82541.5	75366.5	10660.6	353047	8214.71	123570	1893.99	28370.2	130608	245514	623260
	2049	202825	1.09634e+06	46970	1.42611e+06	44597.4	130962	32637.8	975096	624928	59332.8	29112.8	149331	1.15522e+06	57099.5	9925.12	72223.8	401504	120895	100154	5211.87	322322	10166.2	134365	1941.28	35994.1	145715	241626	621250
	2050	219281	1.52885e+06	33582.4	1.38751e+06	47742.8	149970	27233.2	1.14103e+06	607385	24303.7	10586.9	163673	1.14149e+06	83513.6	13411.6	97735	399390	113637	100641	10390.8	322091	15343.5	133495	2222.45	29077.6	175157	192126	581644

## Sheet: F3. Material intensity
Figure 3 – Material intensity for 8 wood-based and 8 conventional case buildings divided into external envelope (foundation, ground slab, external walls, roof, beams and pillars, windows, doors, glazing, balconies), internal elements (internal walls, slab, stairs and ramps, other) and systems and equipment (heating systems, ventilation and cooling, drainage, water, technical equipment).
Building object	Single family, wood	Single family, conventional	Multi family, wood	Multi family, conventional	Office, wood	Office, conventional	Day care, wood	Day care, conventional	School, wood	School, conventional	Retail, wood	Retail, conventional	Sports centre, wood	Sports centre, conventional	Cultural centre, wood	Cultural centre, conventional
External envelope	6.13975e+08	1.03328e+09	4.42051e+08	9.38508e+08	9.83094e+08	5.65006e+08	4.07128e+07	3.66695e+07	1.60744e+08	2.34304e+08	2.1763e+07	8.97367e+07	6.00191e+07	7.39826e+07	3.94533e+07	7.17967e+06
Internal elements	2.89445e+07	5.10049e+07	9.75758e+07	1.15892e+09	5.10714e+06	1.02549e+09	1.9593e+06	2.27056e+07	1.38697e+07	1.94013e+08	3.13964e+06	1.73552e+07	171326	2.85258e+07	7.83119e+06	2.03753e+07
Systems and equipment	4.48936e+06	7.7448e+06	2.09427e+06	834920	0	8.99944e+06	341171	476380	53919.8	3.0688e+06	186320	379524	19369.7	306940	556729	128479

## Sheet: F4. MFA
Figure 4 – Expected material flow (million tons (Mt)) of new buildings in Denmark predicted for year 2025 to 2050 for either a wood-based or a conventional pathway.
Single family houses							Multi family houses							Offices							Daycare							School							Retail							Sport centre							Sport centre
From, wood	To, wood	Forecasted weight, wood [kg]	From, conv	To, conv	Forecasted weight, conv [kg]		From, wood	To, wood	Forecasted weight, wood [kg]	From, conv	To, conv	Forecasted weight, conv [kg]		From, wood	To, wood	Forecasted weight, wood [kg]	From, conv	To, conv	Forecasted weight, conv [kg]		From, wood	To, wood	Forecasted weight, wood [kg]	From, conv	To, conv	Forecasted weight, conv [kg]		From, wood	To, wood	Forecasted weight, wood [kg]	From, conv	To, conv	Forecasted weight, conv [kg]		From, wood	To, wood	Forecasted weight, wood [kg]	From, conv	To, conv	Forecasted weight, conv [kg]		From, wood	To, wood	Forecasted weight, wood [kg]	From, conv	To, conv	Forecasted weight, conv [kg]		From, wood
Wood	Single family	6.47409e+08	Conventional	Single family	1.09203e+09		Wood	Multi family	5.41721e+08	Conventional	Multi family	2.09826e+09		Wood	Office	9.88201e+08	Conventional	Office	1.5995e+09		Wood	Day care	4.30132e+07	Conventional	Day care	5.98515e+07		Wood	School	1.74668e+08	Conventional	School	4.31385e+08		Wood	Retail	2.50889e+07	Conventional	Retail	1.07471e+08		Wood	Sport centre	6.02098e+07	Conventional	Sport centre	1.02815e+08		Wood
Single family	Drainage	392212	Single family	Roof	1.72186e+08		Multi family	Drainage	68381.4	Multi family	Internal walls	4.33232e+08		Office	Foundation	6.23113e+08	Office	Beams and pillars	3.1213e+08		Day care	Drainage	22735	Day care	Internal walls	5.13924e+06		School	Technical equipment	53919.8	School	Beams and pillars	4.00628e+07		Retail	Drainage	7667.96	Retail	Beams and pillars	1.47941e+06		Sport centre	Drainage	19369.7	Sport centre	Roof	7.45796e+06		Cultural building
Single family	Foundation	2.82657e+08	Single family	Ground slab	3.9998e+08		Multi family	Technical equipment	1.0812e+06	Multi family	Beams and pillars	1.79272e+07		Office	Internal walls	704292	Office	Roof	1.45284e+07		Day care	Technical equipment	41633.4	Day care	Beams and pillars	4.14666e+06		School	Foundation	3.6006e+07	School	Roof	7.91966e+07		Retail	Technical equipment	108359	Retail	Roof	3.27503e+07		Sport centre	Foundation	1.29048e+07	Sport centre	Ground slab	3.30772e+07		Cultural building
Single family	Internal walls	2.89445e+07	Single family	Heating systems	3.38139e+06		Multi family	Foundation	1.33105e+08	Multi family	Roof	1.76836e+07		Office	Beams and pillars	4.64532e+07	Office	Ground slab	8.00153e+07		Day care	Foundation	1.53436e+07	Day care	Roof	4.54573e+06		School	Internal walls	6.38257e+06	School	Ground slab	1.04849e+08		Retail	Foundation	2.9446e+06	Retail	Ground slab	3.31717e+07		Sport centre	Internal walls	171326	Sport centre	Heating systems	81016.8		Cultural building
Single family	Roof	1.25992e+08	Single family	Ventilation and cooling	792180		Multi family	Internal walls	4.61938e+07	Multi family	Ground slab	2.32727e+08		Office	Roof	4.59772e+07	Office	Heating systems	2.69228e+06		Day care	Internal walls	1.9593e+06	Day care	Ground slab	3.25999e+06		School	Beams and pillars	1.77129e+07	School	Heating systems	596337		Retail	Internal walls	536417	Retail	Heating systems	7759.53		Sport centre	Beams and pillars	5.08343e+06	Sport centre	Ventilation and cooling	165994		Cultural building
Single family	Ground slab	8.72836e+07	Single family	External walls	1.47202e+08		Multi family	Roof	2.91683e+07	Multi family	Heating systems	24167		Office	Ground slab	2.34e+08	Office	Ventilation and cooling	3.16383e+06		Day care	Beams and pillars	888266	Day care	Heating systems	159008		School	Roof	7.11694e+06	School	Ventilation and cooling	2.33081e+06		Retail	Beams and pillars	1.24854e+06	Retail	Ventilation and cooling	333791		Sport centre	Roof	1.70401e+06	Sport centre	External walls	2.08853e+07		Cultural building
Single family	Water	1.54205e+06	Single family	Windows, doors, glazing	2.23645e+07		Multi family	Ground slab	1.0847e+08	Multi family	Ventilation and cooling	595425		Office	Windows, doors, glazing	4.32872e+06	Office	External walls	8.14824e+07		Day care	Roof	5.54619e+06	Day care	Ventilation and cooling	181080		School	Ground slab	9.05121e+07	School	External walls	8.34588e+06		Retail	Roof	2.15542e+06	Retail	External walls	11854.1		Sport centre	Ground slab	3.71028e+07	Sport centre	Windows, doors, glazing	343833		Cultural building
Single family	Heating systems	2.55509e+06	Single family	Water	1.09382e+06		Multi family	Heating systems	289434	Multi family	External walls	4.19973e+08		Office	External walls	2.92217e+07	Office	Stairs and ramps	1.83772e+07		Day care	Ground slab	1.6231e+07	Day care	External walls	1.28962e+07		School	Windows, doors, glazing	3.93369e+06	School	Stairs and ramps	4.26247e+06		Retail	Ground slab	1.21582e+07	Retail	Stairs and ramps	1.20018e+06		Sport centre	Windows, doors, glazing	844967	Sport centre	Water	5361.4		Cultural building
Single family	Windows, doors, glazing	1.35756e+07	Single family	Internal walls	5.10049e+07		Multi family	Ventilation and cooling	655258	Multi family	Slab	6.56509e+08		Office	Other	1.68842e+06	Office	Windows, doors, glazing	3.77401e+06		Day care	Water	22573.8	Day care	Slab	1.6586e+07		School	External walls	5.46283e+06	School	Windows, doors, glazing	1.84976e+06		Retail	Water	8011.5	Retail	Windows, doors, glazing	232694		Sport centre	External walls	2.37918e+06	Sport centre	Internal walls	2.78872e+06		Cultural building
Single family	External walls	1.04467e+08	Single family	Technical equipment	1.83039e+06		Multi family	Windows, doors, glazing	6.41992e+06	Multi family	Stairs and ramps	6.91778e+07		Office	Slab	2.71443e+06	Office	Water	155005		Day care	Heating systems	113645	Day care	Stairs and ramps	980388		School	Slab	7.24149e+06	School	Water	25524.3		Retail	Ventilation and cooling	62281.5	Retail	Water	7815.36		External walls	Bio based	2.15731e+06	Sport centre	Technical equipment	37827.7		Cultural building
External walls	Bio based	1.02882e+08	Single family	Drainage	647025		Multi family	External walls	1.56756e+08	Multi family	Technical equipment	215328		External walls	Bio based	2.92217e+07	Office	Drainage	1.2109e+06		Day care	Ventilation and cooling	140584	Day care	Foundation	1.11142e+07		School	Stairs and ramps	245594	School	Slab	1.46855e+08		Retail	Windows, doors, glazing	421197	Retail	Drainage	30158.5		External walls	Plastic	221876	Sport centre	Drainage	16740.4		Cultural building
External walls	Mortar	1.58451e+06	Single family	Foundation	2.91547e+08		Multi family	Balconies	8.13098e+06	Multi family	Foundation	2.18033e+08		Windows, doors, glazing	Bio based	770976	Office	Balconies	291844		Day care	Windows, doors, glazing	660109	Day care	Windows, doors, glazing	706695		External walls	Bio based	3.45888e+06	School	Internal walls	4.28952e+07		Retail	External walls	2.835e+06	Retail	Slab	7.09617e+06		Windows, doors, glazing	Aluminium	32171.4	Sport centre	Foundation	6.47987e+06		Cultural building
Windows, doors, glazing	Aluminium	409000	External walls	Bio based	9.12582e+06		Multi family	Other	1.21308e+06	Multi family	Windows, doors, glazing	8.86964e+06		Windows, doors, glazing	Glas	3.55231e+06	Office	Slab	7.45563e+08		Day care	External walls	2.04364e+06	Day care	Water	136291		External walls	Concrete	18786.3	School	Technical equipment	116125		Retail	Other	15087.4	Retail	Foundation	2.20907e+07		Windows, doors, glazing	Bio based	185269	Sport centre	Slab	1.99988e+07		Cultural building
Windows, doors, glazing	Bio based	7.03759e+06	External walls	Concrete	3.21579e+07		Multi family	Slab	4.04638e+07	Multi family	Balconies	2.32938e+07		Windows, doors, glazing	Paint	5436.87	Office	Technical equipment	1.77742e+06		External walls	Bio based	749152	External walls	Bio based	1.76083e+06		External walls	Insulation	779882	External walls	Aluminium	835914		Retail	Slab	2.58814e+06	Retail	Internal walls	9.05888e+06		Windows, doors, glazing	Glas	626716	Sport centre	Beams and pillars	5.73851e+06		Cultural building
Windows, doors, glazing	Glas	5.96876e+06	External walls	Plastic	127967		Multi family	Stairs and ramps	9.70517e+06	External walls	Aluminium	1.07935e+06		Ground slab	Concrete	2.33216e+08	Office	Foundation	7.27838e+07		External walls	Insulation	415293	External walls	Concrete	5.86229e+06		External walls	Plaster	871504	External walls	Bio based	2.927e+06		External walls	Aluminium	791.917	External walls	Aluminium	1924.2		Windows, doors, glazing	Paint	213.382	Sport centre	Stairs and ramps	5.73824e+06		Cultural building
Windows, doors, glazing	Steel	160215	External walls	Insulation	4.22073e+06		External walls	Bio based	1.19324e+08	External walls	Concrete	3.15614e+08		Ground slab	Plastic	783616	Office	Internal walls	2.61551e+08		External walls	Paint	15820.7	External walls	Steel	423914		External walls	Plastic	17430.1	External walls	Concrete	3.05098e+06		External walls	Bio based	398704	External walls	Insulation	2349.66		Windows, doors, glazing	Steel	596.873	External walls	Aluminium	188525		Cultural building
Heating systems	Aluminium	2.431e+06	External walls	Glas	2.1757e+06		External walls	Concrete	1.26812e+07	External walls	Plastic	8441.79		Roof	Bio based	4.59772e+07	External walls	Aluminium	591755		External walls	Plaster	855052	External walls	Insulation	54791.7		External walls	Steel	316347	External walls	Plastic	15479.9		External walls	Concrete	320143	External walls	Paint	712.666		Ground slab	Concrete	3.48383e+07	External walls	Concrete	1.85364e+07		External walls
Heating systems	Plastic	124090	External walls	Plaster	3.11845e+06		External walls	Insulation	1.69356e+07	External walls	Steel	1.17474e+07		Beams and pillars	Bio based	4.64532e+07	External walls	Concrete	4.34528e+07		External walls	Plastic	8326.68	External walls	Plaster	991633		Windows, doors, glazing	Aluminium	210694	External walls	Insulation	149203		External walls	Insulation	28809.9	External walls	Mortar	402.286		Ground slab	Steel	2.26449e+06	External walls	Plastic	4246.23		External walls
Water	Plastic	163276	External walls	Paint	203802		External walls	Paint	398859	External walls	Insulation	1.26191e+07		Internal walls	Bio based	704292	External walls	Plastic	28086.9		Windows, doors, glazing	Aluminium	131143	External walls	Paint	8543.88		Windows, doors, glazing	Bio based	1.27623e+06	External walls	Plaster	1.31579e+06		External walls	Plaster	273627	External walls	Fired clay	6465.31		Roof	Bio based	451140	External walls	Steel	1.19304e+06		External walls
Water	Steel	1.37878e+06	External walls	Mortar	3.1357e+07		External walls	Plaster	7.41696e+06	External walls	Plaster	1.68263e+06		Foundation	Concrete	6.23113e+08	External walls	Steel	2.40862e+06		Windows, doors, glazing	Bio based	219128	External walls	Mortar	1.31937e+06		Windows, doors, glazing	Glas	2.13038e+06	External walls	Paint	31132.8		External walls	Plastic	5472.54	Ventilation and cooling	Aluminium	120423		Roof	Bitumen	1.23238e+06	External walls	Insulation	887843		External walls
Ground slab	Bio based	3.02452e+07	External walls	Fired clay	6.47144e+07		Windows, doors, glazing	Aluminium	38256.2	External walls	Fired clay	7.72226e+07		Other	Bio based	1.68842e+06	External walls	Insulation	2.5673e+06		Windows, doors, glazing	Glas	308707	External walls	Fired clay	2.47482e+06		Windows, doors, glazing	Paint	5847.45	External walls	Mortar	20380		External walls	Steel	391.161	Ventilation and cooling	Steel	213368		Roof	Insulation	5819.51	External walls	Paint	55417.5		External walls
Ground slab	Concrete	4.72099e+07	Ventilation and cooling	Aluminium	327536		Windows, doors, glazing	Bio based	1.09535e+06	Ventilation and cooling	Aluminium	595425		Slab	Bio based	2.71443e+06	External walls	Plaster	3.32314e+06		Windows, doors, glazing	Paint	1129.78	Ventilation and cooling	Aluminium	53088.2		Windows, doors, glazing	Plastic	310530	Ventilation and cooling	Aluminium	386284		External walls	Fired clay	1.80706e+06	Heating systems	Steel	7759.53		Roof	Plastic	14671.1	External walls	Mortar	14411.5		External walls
Ground slab	Insulation	3.12831e+06	Ventilation and cooling	Steel	464644		Windows, doors, glazing	Glas	5.28182e+06	Heating systems	Aluminium	24167		Bio based	Construction	1.24664e+08	External walls	Paint	152906		Ventilation and cooling	Aluminium	42017.8	Ventilation and cooling	Steel	127992		Ground slab	Bio based	665548	Ventilation and cooling	Steel	1.94453e+06		Windows, doors, glazing	Aluminium	118471	Ground slab	Concrete	2.0595e+07		Beams and pillars	Bio based	5.08343e+06	External walls	Bitumen	5378.56		External walls
Ground slab	Plastic	140200	Heating systems	Aluminium	1.02069e+06		Windows, doors, glazing	Paint	4488.31	Ground slab	Concrete	2.24566e+08		Bio based	Use	2.86628e+06	External walls	Mortar	6.97779e+06		Ventilation and cooling	Steel	98565.7	Heating systems	Aluminium	1417.7		Ground slab	Concrete	8.33513e+07	Ventilation and cooling	Insulation	1.95631		Windows, doors, glazing	Bio based	32931.4	Ground slab	Plastic	305383		Internal walls	Bio based	154853	Ventilation and cooling	Aluminium	83869		External walls
Ground slab	Steel	1.4041e+06	Heating systems	Plastic	2.14787e+06		Ventilation and cooling	Aluminium	58701.2	Ground slab	Plastic	3.42387e+06		Concrete	Construction	8.56329e+08	External walls	Fired clay	2.198e+07		Heating systems	Aluminium	9874.88	Heating systems	Steel	157590		Ground slab	Insulation	327061	Heating systems	Aluminium	13758.6		Windows, doors, glazing	Glas	269594	Ground slab	Steel	733571		Internal walls	Insulation	16473.7	Ventilation and cooling	Steel	82124.8		External walls
Ground slab	Fired clay	4.50273e+06	Heating systems	Steel	212821		Ventilation and cooling	Steel	596557	Ground slab	Steel	3.28691e+06		Glas	Use	3.55231e+06	Ventilation and cooling	Aluminium	366621		Heating systems	Insulation	2253.28	Ground slab	Concrete	3.08726e+06		Ground slab	Plastic	115439	Heating systems	Plastic	24542.3		Windows, doors, glazing	Paint	200.709	Ground slab	Aggregate	1.15378e+07		Foundation	Concrete	1.28922e+07	Heating systems	Aluminium	7148.54		External walls
Ground slab	Clay	653106	Ground slab	Bio based	4.21219e+06		Heating systems	Steel	289434	Ground slab	Insulation	1.45093e+06		Paint	Construction	4797.76	Ventilation and cooling	Steel	2.79721e+06		Heating systems	Plastic	58391.2	Ground slab	Plastic	5369.15		Ground slab	Steel	6.05277e+06	Heating systems	Steel	558036		Ventilation and cooling	Aluminium	62281.5	Roof	Concrete	6.41383e+06		Foundation	Insulation	12608.9	Heating systems	Steel	73868.2		Windows, doors, glazing
Roof	Bio based	9.78224e+07	Ground slab	Concrete	3.68487e+08		Ground slab	Concrete	9.82137e+07	Roof	Aluminium	244811		Paint	Use	639.11	Heating systems	Aluminium	87088.1		Heating systems	Steel	43125.6	Ground slab	Steel	102934		Roof	Bitumen	2.85288e+06	Ground slab	Concrete	9.79804e+07		Water	Steel	8011.5	Roof	Plastic	10257.6		Drainage	Steel	19369.7	Ground slab	Concrete	3.13892e+07		Windows, doors, glazing
Roof	Bitumen	2.79994e+07	Ground slab	Plastic	816783		Ground slab	Insulation	3.28563e+06	Roof	Bio based	2.33566e+06		Plastic	Construction	783616	Heating systems	Steel	2.6052e+06		Water	Aluminium	184.291	Ground slab	Insulation	64429.7		Roof	Insulation	4.16067e+06	Ground slab	Steel	6.86819e+06		Ground slab	Concrete	1.1544e+07	Roof	Steel	483757		Aluminium	Use	32171.4	Ground slab	Steel	722717		Windows, doors, glazing
Roof	Plastic	170318	Ground slab	Steel	7.15978e+06		Ground slab	Steel	6.97087e+06	Roof	Concrete	2.82268e+06		Construction	Incineration	1.25452e+08	Ground slab	Concrete	7.55552e+07		Water	Insulation	12393	Roof	Aluminium	5866.85		Roof	Plaster	52452	Roof	Concrete	6.88965e+07		Ground slab	Plastic	405500	Roof	Insulation	2.52521e+07		Bio based	Construction	7.8724e+06	Ground slab	Insulation	965234		Windows, doors, glazing
Internal walls	Bio based	2.79213e+07	Ground slab	Insulation	7.40961e+06		Roof	Bio based	7.05649e+06	Roof	Steel	465457		Construction	Recycled	8.56329e+08	Ground slab	Plastic	2.32998e+06		Water	Plastic	9996.49	Roof	Bio based	300236		Roof	Plastic	50944.2	Roof	Steel	4.82948e+06		Ground slab	Steel	208752	Roof	Bitumen	584006		Bio based	Use	159604	Roof	Aluminium	58484		Windows, doors, glazing
Internal walls	Mortar	1.0232e+06	Ground slab	Glas	1.02983e+07		Roof	Bitumen	5.07922e+06	Roof	Insulation	7.6874e+06		Use	Incineration	6.41923e+06	Ground slab	Steel	2.13007e+06		Ground slab	Bio based	137883	Roof	Concrete	3.72379e+06		Beams and pillars	Bio based	1.45444e+07	Roof	Insulation	4.41987e+06		Roof	Bio based	125232	Roof	Paint	6353.27		Bitumen	Use	1.23238e+06	Roof	Plastic	33550.5		Windows, doors, glazing
Foundation	Concrete	2.80785e+08	Ground slab	Mortar	1.59624e+06		Roof	Insulation	4.28559e+06	Roof	Plaster	2.58587e+06					Roof	Bio based	929645		Ground slab	Concrete	1.5444e+07	Roof	Plastic	48615.7		Beams and pillars	Steel	3.16849e+06	Roof	Bitumen	1.05083e+06		Roof	Bitumen	1.30124e+06	Beams and pillars	Bio based	1.12232e+06		Concrete	Construction	4.77304e+07	Roof	Insulation	5.90049e+06		Windows, doors, glazing
Foundation	Steel	1.87166e+06	Roof	Bio based	8.07185e+07		Roof	Paint	258496	Roof	Bitumen	1.54173e+06					Roof	Insulation	1.03545e+07		Ground slab	Insulation	40109	Roof	Steel	75409.4		Internal walls	Concrete	1.81521e+06	Beams and pillars	Concrete	3.01848e+07		Roof	Insulation	22482.7	Beams and pillars	Concrete	52279		Glas	Use	626716	Roof	Paint	485.386		Windows, doors, glazing
Drainage	Steel	392212	Roof	Concrete	6.59512e+07		Roof	Plaster	1.24033e+07	Beams and pillars	Concrete	1.75757e+07					Roof	Bitumen	3.24423e+06		Ground slab	Plastic	30211.8	Roof	Insulation	143414		Internal walls	Glas	2205.72	Beams and pillars	Steel	9.87806e+06		Roof	Steel	706461	Beams and pillars	Steel	304811		Insulation	Construction	34902.1	Roof	Bitumen	1.46495e+06		Windows, doors, glazing
Aluminium	Use	2.84e+06	Roof	Plastic	886442		Roof	Plastic	85258.3	Beams and pillars	Steel	351514					Beams and pillars	Concrete	2.91421e+08		Ground slab	Steel	578749	Roof	Bitumen	177664		Internal walls	Insulation	307455	Stairs and ramps	Bio based	128508		Beams and pillars	Bio based	951649	Stairs and ramps	Concrete	1.09767e+06		Paint	Construction	213.382	Windows, doors, glazing	Aluminium	129630		Ventilation and cooling
Bio based	Construction	2.47942e+08	Roof	Insulation	2.50777e+06		Internal walls	Concrete	4.06852e+07	Internal walls	Concrete	4.2232e+08					Beams and pillars	Steel	2.07097e+07		Roof	Bio based	1.90952e+06	Roof	Copper	70734		Internal walls	Paint	91299.7	Stairs and ramps	Concrete	3.6528e+06		Beams and pillars	Steel	296896	Stairs and ramps	Steel	102505		Plastic	Construction	236547	Windows, doors, glazing	Bio based	43476.7		Ventilation and cooling
Bio based	Use	1.7967e+07	Roof	Plaster	1.48215e+07		Internal walls	Glas	1.64139e+06	Internal walls	Steel	1.02466e+07					Stairs and ramps	Concrete	1.73703e+07		Roof	Bitumen	645233	Beams and pillars	Concrete	3.87815e+06		Internal walls	Plaster	2.13932e+06	Stairs and ramps	Steel	481163		Internal walls	Insulation	50426.3	Windows, doors, glazing	Aluminium	185165		Steel	Construction	2.28445e+06	Windows, doors, glazing	Steel	26481		Heating systems
Bitumen	Use	2.79994e+07	Roof	Paint	485582		Internal walls	Steel	3.49662e+06	Internal walls	Insulation	19544.9					Stairs and ramps	Steel	1.00691e+06		Roof	Insulation	964495	Beams and pillars	Steel	268503		Internal walls	Steel	1.94713e+06	Windows, doors, glazing	Aluminium	84699.4		Internal walls	Plaster	336003	Windows, doors, glazing	Bio based	14811.6		Construction	Incineration	8.10916e+06	Windows, doors, glazing	Glas	143989		Water
Concrete	Construction	3.27995e+08	Roof	Mortar	6.81518e+06		Internal walls	Mortar	370637	Internal walls	Plaster	367641					Windows, doors, glazing	Aluminium	731900		Roof	Plaster	1.26392e+06	Internal walls	Bio based	119999		Internal walls	Mortar	79956.1	Windows, doors, glazing	Plastic	165845		Internal walls	Plastic	17585.9	Windows, doors, glazing	Plastic	7707.48		Construction	Landfill	34902.1	Windows, doors, glazing	Paint	255.56		Stairs and ramps
Glas	Use	5.96876e+06	Windows, doors, glazing	Aluminium	2.63412e+06		Foundation	Concrete	1.25417e+08	Internal walls	Paint	278231					Windows, doors, glazing	Bio based	840387		Roof	Steel	763010	Internal walls	Concrete	3.72032e+06		Foundation	Concrete	3.37504e+07	Windows, doors, glazing	Glas	1.59922e+06		Internal walls	Steel	82408.7	Windows, doors, glazing	Glas	24886.3		Construction	Recycled	5.00149e+07	Water	Steel	5361.4		Stairs and ramps
Insulation	Construction	3.12831e+06	Windows, doors, glazing	Bio based	7.73149e+06		Foundation	Insulation	163650	Slab	Bio based	1.0499e+06					Windows, doors, glazing	Plastic	149948		Beams and pillars	Bio based	524533	Internal walls	Steel	310377		Foundation	Steel	2.25567e+06	Water	Aluminium	70.7996		Internal walls	Mortar	7445.72	Windows, doors, glazing	Paint	123.143		Use	Incineration	2.0187e+06	Internal walls	Bio based	178042		Stairs and ramps
Plastic	Construction	140200	Windows, doors, glazing	Glas	1.1979e+07		Foundation	Steel	7.52406e+06	Slab	Concrete	6.35751e+08					Windows, doors, glazing	Steel	159764		Beams and pillars	Steel	363733	Internal walls	Insulation	58191.9		Technical equipment	Glas	53919.8	Water	Steel	25453.5		Internal walls	Fired clay	42547	Water	Steel	7815.36		Use	Recycled	32171.4	Internal walls	Concrete	859969		Stairs and ramps
Plastic	Use	457685	Windows, doors, glazing	Paint	19878.8		Technical equipment	Glas	1.0812e+06	Slab	Plastic	4.69892e+06					Windows, doors, glazing	Glas	1.88508e+06		Internal walls	Bio based	269768	Internal walls	Plaster	577047		Slab	Bio based	2.08784e+06	Slab	Bio based	194537		Foundation	Concrete	2.83175e+06	Drainage	Plastic	27916.4					Internal walls	Plastic	84680.4		Ground slab
Steel	Construction	3.43597e+06	Water	Steel	1.09382e+06		Drainage	Steel	68381.4	Slab	Steel	1.17907e+07					Windows, doors, glazing	Paint	6924.72		Internal walls	Glas	161162	Internal walls	Paint	12110.7		Slab	Concrete	1.75739e+06	Slab	Concrete	1.35128e+08		Foundation	Plastic	9287.23	Drainage	Zinc	2242.05					Internal walls	Steel	226221		Ground slab
Steel	Use	1.77099e+06	Internal walls	Concrete	4.47881e+07		Balconies	Steel	8.13098e+06	Slab	Insulation	884984					Water	Steel	155005		Internal walls	Insulation	194967	Internal walls	Mortar	341197		Slab	Insulation	481078	Slab	Plastic	66906.3		Foundation	Mortar	103561	Slab	Aluminium	5065.13					Internal walls	Insulation	136710		Ground slab
Mortar	Construction	2.60771e+06	Internal walls	Glas	123105		Other	Aluminium	1.21308e+06	Slab	Glas	2.13105e+06					Drainage	Plastic	1.2109e+06		Internal walls	Paint	57924.2	Slab	Bio based	607986		Slab	Paint	1920.64	Slab	Steel	1.0438e+07		Technical equipment	Glas	108359	Slab	Bio based	49815.4					Internal walls	Glas	37172.4		Ground slab
Fired clay	Construction	4.50273e+06	Internal walls	Paint	1.16949e+06		Slab	Bio based	2.02936e+07	Slab	Mortar	202450					Balconies	Steel	291844		Internal walls	Plaster	1.24083e+06	Slab	Concrete	1.58901e+07		Slab	Plaster	2.35193e+06	Slab	Plaster	96321.6		Drainage	Steel	7667.96	Slab	Concrete	6.01411e+06					Internal walls	Plaster	1.21829e+06		Roof
Clay	Construction	653106	Internal walls	Mortar	4.92419e+06		Slab	Insulation	2.329e+06	Stairs and ramps	Bio based	18125.3					Slab	Bio based	4.18387e+06		Internal walls	Plastic	9669.69	Slab	Plastic	4618.82		Slab	Steel	561342	Slab	Paint	4384.35		Other	Bio based	8948.14	Slab	Plastic	18163.8					Internal walls	Paint	47639.6		Roof
Construction	Incineration	2.48082e+08	Technical equipment	Glas	1.83039e+06		Slab	Paint	524115	Stairs and ramps	Concrete	1.65344e+07					Slab	Concrete	7.34911e+08		Internal walls	Mortar	24980	Slab	Insulation	83288.1		Stairs and ramps	Bio based	239254	Slab	Mortar	927183		Other	Bitumen	5794.35	Slab	Steel	6350.35					Technical equipment	Steel	5957.11		Roof
Construction	Landfill	3.12831e+06	Drainage	Plastic	647025		Slab	Plaster	1.53321e+07	Stairs and ramps	Steel	1.45374e+06					Slab	Plastic	1.03846e+06		Foundation	Concrete	1.52407e+07	Stairs and ramps	Bio based	103000		Stairs and ramps	Steel	6339.77	Internal walls	Concrete	3.85784e+07		Other	Steel	344.902	Slab	Glas	950392					Technical equipment	Glas	31870.6		Roof
Construction	Recycled	3.39194e+08	Foundation	Concrete	2.85449e+08		Slab	Plastic	198472	Stairs and ramps	Aggregate	5.11715e+07					Slab	Steel	385437		Foundation	Insulation	1588.34	Stairs and ramps	Steel	877388		Aluminium	Construction	197696	Internal walls	Glas	3.61852e+06		Slab	Bio based	107131	Slab	Mortar	52271.6					Drainage	Plastic	9915.02		Roof
Use	Incineration	5.23928e+07	Foundation	Steel	6.09826e+06		Slab	Steel	1.78654e+06	Foundation	Concrete	2.16255e+08					Slab	Insulation	3.71157e+06		Foundation	Steel	101359	Foundation	Concrete	1.08054e+07		Aluminium	Use	12998.2	Internal walls	Paint	54374.1		Slab	Concrete	1.21202e+06	Foundation	Concrete	2.18368e+07					Drainage	Steel	1072.28		Roof
Use	Recycled	4.61099e+06	Aluminium	Construction	2.63412e+06		Stairs and ramps	Bio based	7.06608e+06	Foundation	Steel	1.7786e+06					Slab	Paint	289077		Technical equipment	Glas	41633.4	Foundation	Steel	308800		Bio based	Construction	2.09206e+07	Internal walls	Mortar	643904		Slab	Plaster	77681.5	Foundation	Plastic	14330.5					Drainage	Insulation	5181.26		Roof
			Aluminium	Use	1.34823e+06		Stairs and ramps	Steel	2.6391e+06	Windows, doors, glazing	Aluminium	968339					Slab	Mortar	140033		Drainage	Plastic	18739.5	Windows, doors, glazing	Aluminium	39865.2		Bio based	Use	1.35149e+06	Technical equipment	Steel	66815.3		Slab	Steel	14877	Foundation	Steel	239515					Drainage	Bitumen	571.883		Roof
			Bio based	Construction	1.01788e+08		Aluminium	Construction	1.21308e+06	Windows, doors, glazing	Bio based	391269					Slab	Fired clay	903437		Drainage	Steel	3995.46	Windows, doors, glazing	Bio based	390832		Bitumen	Use	2.85288e+06	Technical equipment	Glas	49309.2		Slab	Mortar	175212	Internal walls	Aluminium	10295.4					Foundation	Concrete	6.40753e+06		Roof
			Concrete	Construction	7.96834e+08		Aluminium	Use	96957.4	Windows, doors, glazing	Steel	110927					Technical equipment	Steel	1.3816e+06		Aluminium	Construction	131143	Windows, doors, glazing	Glas	275998		Concrete	Construction	1.20693e+08	Aluminium	Construction	920613		Slab	Fired clay	1.00121e+06	Internal walls	Concrete	8.29596e+06					Foundation	Steel	72343.2		Roof
			Plastic	Construction	944751		Bio based	Construction	1.5374e+08	Windows, doors, glazing	Glas	7.04566e+06					Technical equipment	Glas	395818		Aluminium	Use	52077	Water	Aluminium	297.867		Glas	Construction	2205.72	Aluminium	Use	400114		Aluminium	Construction	38352.7	Internal walls	Plastic	14020.7					Slab	Bio based	3.47786e+06		Roof
			Plastic	Use	3.68134e+06		Bio based	Use	1.09535e+06	Windows, doors, glazing	Plaster	353443					Foundation	Concrete	7.03043e+07		Bio based	Construction	2.34501e+06	Water	Plastic	9380.92		Glas	Use	2.1843e+06	Bio based	Construction	3.25004e+06		Aluminium	Use	143192	Internal walls	Steel	191749					Slab	Concrete	1.46674e+07		Beams and pillars
			Steel	Construction	1.44504e+07		Bitumen	Use	5.07922e+06	Balconies	Steel	2.32938e+07					Foundation	Steel	2.47948e+06		Bio based	Use	1.46498e+06	Water	Steel	126612		Insulation	Construction	5.92875e+06	Concrete	Construction	3.77472e+08		Bio based	Construction	1.5357e+06	Internal walls	Insulation	10935.8					Slab	Steel	1.53498e+06		Beams and pillars
			Steel	Use	578901		Concrete	Construction	2.76997e+08	Technical equipment	Glas	215328					Internal walls	Bio based	3232.64		Bitumen	Use	645233	Aluminium	Construction	45732.1		Insulation	Use	127398	Plastic	Construction	248231		Bio based	Use	88898.8	Internal walls	Glas	7867.83					Slab	Insulation	318576		Beams and pillars
			Insulation	Construction	1.41381e+07		Glas	Construction	1.64139e+06	Aluminium	Construction	2.2925e+06					Internal walls	Concrete	2.11162e+08		Concrete	Construction	3.06847e+07	Aluminium	Use	54803.7		Paint	Construction	5003.3	Plastic	Use	24542.3		Bitumen	Construction	284476	Internal walls	Plaster	477071					Beams and pillars	Steel	5.61937e+06		Internal walls
			Glas	Construction	1.25971e+07		Glas	Use	6.36302e+06	Aluminium	Use	619592					Internal walls	Plastic	36944.4		Glas	Construction	161162	Bio based	Construction	2.80507e+06		Paint	Use	94064.5	Steel	Construction	3.45063e+07		Bitumen	Use	1.02256e+06	Internal walls	Paint	29694.7					Beams and pillars	Plaster	119142		Internal walls
			Glas	Use	1.38094e+07		Insulation	Construction	2.69995e+07	Bio based	Construction	1.82627e+06					Internal walls	Steel	1.43829e+07		Glas	Use	350341	Bio based	Use	477812		Plaster	Construction	4.66244e+06	Steel	Use	583489		Concrete	Construction	1.59079e+07	Internal walls	Mortar	21277.4					Stairs and ramps	Concrete	4.02999e+06		Internal walls
			Plaster	Construction	1.794e+07		Paint	Construction	713200	Bio based	Use	1.96868e+06					Internal walls	Insulation	1.54453e+06		Insulation	Construction	1.30805e+06	Concrete	Construction	4.69673e+07		Plaster	Use	752760	Insulation	Construction	4.56908e+06		Glas	Use	377953	Aluminium	Construction	124488					Stairs and ramps	Steel	366772		Internal walls
			Paint	Construction	1.39318e+06		Paint	Use	472759	Concrete	Construction	1.85144e+09					Internal walls	Plaster	3.29251e+07		Insulation	Use	323053	Plastic	Construction	63365.7		Plastic	Construction	17430.1	Glas	Construction	3.61852e+06		Insulation	Construction	101719	Aluminium	Use	198385					Stairs and ramps	Paint	1126.9		Internal walls
			Paint	Use	485582		Plaster	Construction	2.86446e+07	Plastic	Construction	8.13123e+06					Internal walls	Paint	913335		Paint	Construction	935.981	Plastic	Use	4618.82		Plastic	Use	476914	Glas	Use	1.64853e+06		Paint	Construction	194.177	Bio based	Construction	1.18695e+06					Stairs and ramps	Aggregate	1.34035e+06		Internal walls
			Mortar	Construction	4.46926e+07		Plaster	Use	6.50775e+06	Steel	Construction	6.45256e+07					Internal walls	Mortar	78214.6		Paint	Use	73938.6	Steel	Construction	2.48944e+06		Steel	Construction	1.39804e+07	Plaster	Construction	1.41211e+06		Paint	Use	6.53141	Concrete	Construction	6.43057e+07					Aluminium	Construction	339824		Internal walls
			Fired clay	Construction	6.47144e+07		Plastic	Construction	198472	Insulation	Construction	1.49745e+07					Internal walls	Fired clay	504610		Plaster	Construction	3.35981e+06	Steel	Use	290077		Steel	Use	327695	Bitumen	Construction	93740.7		Plaster	Construction	687312	Plastic	Construction	361985					Aluminium	Use	127833		Internal walls
			Construction	Incineration	1.16723e+08		Plastic	Use	85258.3	Insulation	Use	7.6874e+06					Aluminium	Construction	1.15465e+06		Plastic	Construction	58204.7	Insulation	Construction	404115		Construction	Incineration	2.09453e+07	Bitumen	Use	957092		Plastic	Construction	437846	Plastic	Use	35795					Bio based	Construction	3.69938e+06		Internal walls
			Construction	Recycled	9.41265e+08		Steel	Construction	2.94266e+07	Glas	Construction	9.12837e+06					Aluminium	Use	622713		Plastic	Use	77130.7	Glas	Use	275998		Construction	Landfill	5.92875e+06	Paint	Construction	89891.2		Steel	Construction	1.3178e+06	Steel	Construction	1.9545e+06					Concrete	Construction	7.58905e+07		Foundation
			Construction	Landfill	1.41381e+07		Steel	Use	2.07597e+06	Glas	Use	263662					Bio based	Construction	4.82206e+06		Steel	Construction	1.90523e+06	Plaster	Construction	1.56868e+06		Construction	Recycled	1.39614e+08	Mortar	Construction	1.59147e+06		Steel	Use	8011.5	Steel	Use	336698					Plastic	Construction	804.211		Foundation
			Use	Incineration	1.61459e+07		Mortar	Construction	370637	Plaster	Construction	4.98959e+06					Bio based	Use	1.13508e+06		Steel	Use	47303.9	Bitumen	Use	177664		Use	Incineration	6.90573e+06	Construction	Incineration	7.30043e+06		Mortar	Construction	286219	Insulation	Construction	2.52654e+07					Plastic	Use	131588		Foundation
			Use	Recycled	3.75752e+06		Construction	Incineration	1.56293e+08	Bitumen	Use	1.54173e+06					Concrete	Construction	1.44418e+09		Mortar	Construction	24980	Paint	Construction	1560.97		Use	Landfill	127398	Construction	Recycled	4.15902e+08		Fired clay	Construction	2.85081e+06	Glas	Construction	958260					Steel	Construction	9.76946e+06		Foundation
Multi family	Beams and pillars						Construction	Landfill	2.69995e+07	Paint	Use	278231					Plastic	Construction	2.57489e+06		Construction	Incineration	2.56531e+06	Paint	Use	19093.6		Use	Recycled	1.14737e+06	Construction	Landfill	4.56908e+06		Construction	Incineration	2.25821e+06	Glas	Use	24886.3					Steel	Use	160842		Foundation
Multi family	Roof						Construction	Recycled	3.36652e+08	Mortar	Construction	202450					Plastic	Use	2.21943e+06		Construction	Landfill	1.30805e+06	Mortar	Construction	1.21165e+06					Use	Incineration	2.58085e+06		Construction	Landfill	101719	Plaster	Construction	477071					Insulation	Construction	8.20886e+06		Technical equipment
Multi family	Ground slab						Use	Incineration	1.20144e+07	Fired clay	Construction	7.72226e+07					Steel	Construction	4.90566e+07		Construction	Recycled	3.61058e+07	Mortar	Use	448912					Use	Recycled	1.03291e+06		Construction	Recycled	2.10884e+07	Bitumen	Use	584006					Insulation	Use	5181.26		Technical equipment
Multi family	Heating systems						Use	Recycled	9.76188e+06	Aggregate	Construction	5.11715e+07					Steel	Use	1.83709e+06		Use	Incineration	2.56999e+06	Copper	Construction	70734									Use	Incineration	1.38106e+06	Paint	Construction	835.809					Glas	Construction	91805.1		Slab
Multi family	Ventilation and cooling									Construction	Incineration	1.90859e+07					Insulation	Construction	1.81779e+07		Use	Landfill	323053	Fired clay	Construction	2.47482e+06									Use	Recycled	259562	Paint	Use	36047.9					Glas	Use	121227		Slab
Multi family	External walls									Construction	Recycled	2.05184e+09					Glas	Use	2.2809e+06		Use	Recycled	141014	Construction	Incineration	2.87e+06												Mortar	Construction	73951.2					Plaster	Construction	1.33743e+06		Slab
Multi family	Slab									Construction	Landfill	1.49745e+07					Plaster	Construction	3.62483e+07					Construction	Recycled	5.48284e+07												Fired clay	Construction	6465.31					Paint	Construction	104925		Slab
Multi family	Stairs and ramps									Use	Incineration	3.83697e+06					Bitumen	Use	3.24423e+06					Construction	Landfill	404115												Zinc	Use	2242.05					Mortar	Construction	14411.5		Slab
Multi family	Technical equipment									Use	Recycled	834920					Paint	Construction	657777					Use	Incineration	955188												Aggregate	Construction	1.15378e+07					Bitumen	Construction	1.46552e+06		Slab
Multi family	Foundation									Use	Landfill	7.6874e+06					Paint	Use	704465					Use	Recycled	793793												Construction	Incineration	2.50803e+06					Bitumen	Use	5378.56		Slab
Multi family	Windows, doors, glazing																Mortar	Construction	7.19603e+06																			Construction	Recycled	7.84799e+07					Aggregate	Construction	1.34035e+06		Slab
Multi family	Balconies																Fired clay	Construction	2.33881e+07																			Construction	Landfill	2.52654e+07					Construction	Incineration	5.36244e+06		Slab
External walls	Aluminium																Construction	Incineration	8.05473e+06																			Use	Incineration	680735					Construction	Recycled	8.86919e+07		Slab
External walls	Concrete																Construction	Recycled	1.56122e+09																			Use	Recycled	537325					Construction	Landfill	8.20886e+06		Other
External walls	Plastic																Construction	Landfill	1.81779e+07																										Use	Incineration	226323		Other
External walls	Steel																Use	Incineration	9.18829e+06																										Use	Recycled	320545		Other
External walls	Insulation																Use	Recycled	2.85562e+06																										Use	Landfill	5181.26		Other
External walls	Plaster																																																Drainage
External walls	Fired clay																																																Aggregate
Ventilation and cooling	Aluminium																																																Aluminium
Heating systems	Aluminium																																																Aluminium
Ground slab	Concrete																																																Bio based
Ground slab	Plastic																																																Bio based
Ground slab	Steel																																																Bitumen
Ground slab	Insulation																																																Bitumen
Roof	Aluminium																																																Concrete
Roof	Bio based																																																Fired clay
Roof	Concrete																																																Glas
Roof	Steel																																																Glas
Roof	Insulation																																																Insulation
Roof	Plaster																																																Insulation
Roof	Bitumen																																																Mortar
Beams and pillars	Concrete																																																Paint
Beams and pillars	Steel																																																Plaster
Internal walls	Concrete																																																Plaster
Internal walls	Steel																																																Plastic
Internal walls	Insulation																																																Plastic
Internal walls	Plaster																																																Steel
Internal walls	Paint																																																Steel
Slab	Bio based																																																Zinc
Slab	Concrete																																																Construction
Slab	Plastic																																																Construction
Slab	Steel																																																Construction
Slab	Insulation																																																Use
Slab	Glas																																																Use
Slab	Mortar																																																Use
Stairs and ramps	Bio based
Stairs and ramps	Concrete
Stairs and ramps	Steel
Stairs and ramps	Aggregate
Foundation	Concrete
Foundation	Steel
Windows, doors, glazing	Aluminium
Windows, doors, glazing	Bio based
Windows, doors, glazing	Steel
Windows, doors, glazing	Glas
Windows, doors, glazing	Plaster
Balconies	Steel
Technical equipment	Glas
Aluminium	Construction
Aluminium	Use
Bio based	Construction
Bio based	Use
Concrete	Construction
Plastic	Construction
Steel	Construction
Insulation	Construction
Insulation	Use
Glas	Construction
Glas	Use
Plaster	Construction
Bitumen	Use
Paint	Use
Mortar	Construction
Fired clay	Construction
Aggregate	Construction
Construction	Incineration
Construction	Recycled
Construction	Landfill
Use	Incineration
Use	Recycled
Use	Landfill
Office	Beams and pillars
Office	Roof
Office	Ground slab
Office	Heating systems
Office	Ventilation and cooling
Office	External walls
Office	Stairs and ramps
Office	Windows, doors, glazing
Office	Water
Office	Drainage
Office	Balconies
Office	Slab
Office	Technical equipment
Office	Foundation
Office	Internal walls
External walls	Aluminium
External walls	Concrete
External walls	Plastic
External walls	Steel
External walls	Insulation
External walls	Plaster
External walls	Paint
External walls	Mortar
External walls	Fired clay
Ventilation and cooling	Aluminium
Ventilation and cooling	Steel
Heating systems	Aluminium
Heating systems	Steel
Ground slab	Concrete
Ground slab	Plastic
Ground slab	Steel
Roof	Bio based
Roof	Insulation
Roof	Bitumen
Beams and pillars	Concrete
Beams and pillars	Steel
Stairs and ramps	Concrete
Stairs and ramps	Steel
Windows, doors, glazing	Aluminium
Windows, doors, glazing	Bio based
Windows, doors, glazing	Plastic
Windows, doors, glazing	Steel
Windows, doors, glazing	Glas
Windows, doors, glazing	Paint
Water	Steel
Drainage	Plastic
Balconies	Steel
Slab	Bio based
Slab	Concrete
Slab	Plastic
Slab	Steel
Slab	Insulation
Slab	Paint
Slab	Mortar
Slab	Fired clay
Technical equipment	Steel
Technical equipment	Glas
Foundation	Concrete
Foundation	Steel
Internal walls	Bio based
Internal walls	Concrete
Internal walls	Plastic
Internal walls	Steel
Internal walls	Insulation
Internal walls	Plaster
Internal walls	Paint
Internal walls	Mortar
Internal walls	Fired clay
Aluminium	Construction
Aluminium	Use
Bio based	Construction
Bio based	Use
Concrete	Construction
Plastic	Construction
Plastic	Use
Steel	Construction
Steel	Use
Insulation	Construction
Glas	Use
Plaster	Construction
Bitumen	Use
Paint	Construction
Paint	Use
Mortar	Construction
Fired clay	Construction
Construction	Incineration
Construction	Recycled
Construction	Landfill
Use	Incineration
Use	Recycled
Day care	Internal walls
Day care	Beams and pillars
Day care	Roof
Day care	Ground slab
Day care	Heating systems
Day care	Ventilation and cooling
Day care	External walls
Day care	Slab
Day care	Stairs and ramps
Day care	Foundation
Day care	Windows, doors, glazing
Day care	Water
External walls	Bio based
External walls	Concrete
External walls	Steel
External walls	Insulation
External walls	Plaster
External walls	Paint
External walls	Mortar
External walls	Fired clay
Ventilation and cooling	Aluminium
Ventilation and cooling	Steel
Heating systems	Aluminium
Heating systems	Steel
Ground slab	Concrete
Ground slab	Plastic
Ground slab	Steel
Ground slab	Insulation
Roof	Aluminium
Roof	Bio based
Roof	Concrete
Roof	Plastic
Roof	Steel
Roof	Insulation
Roof	Bitumen
Roof	Copper
Beams and pillars	Concrete
Beams and pillars	Steel
Internal walls	Bio based
Internal walls	Concrete
Internal walls	Steel
Internal walls	Insulation
Internal walls	Plaster
Internal walls	Paint
Internal walls	Mortar
Slab	Bio based
Slab	Concrete
Slab	Plastic
Slab	Insulation
Stairs and ramps	Bio based
Stairs and ramps	Steel
Foundation	Concrete
Foundation	Steel
Windows, doors, glazing	Aluminium
Windows, doors, glazing	Bio based
Windows, doors, glazing	Glas
Water	Aluminium
Water	Plastic
Water	Steel
Aluminium	Construction
Aluminium	Use
Bio based	Construction
Bio based	Use
Concrete	Construction
Plastic	Construction
Plastic	Use
Steel	Construction
Steel	Use
Insulation	Construction
Glas	Use
Plaster	Construction
Bitumen	Use
Paint	Construction
Paint	Use
Mortar	Construction
Mortar	Use
Copper	Construction
Fired clay	Construction
Construction	Incineration
Construction	Recycled
Construction	Landfill
Use	Incineration
Use	Recycled
School	Beams and pillars
School	Roof
School	Ground slab
School	Heating systems
School	Ventilation and cooling
School	External walls
School	Stairs and ramps
School	Windows, doors, glazing
School	Water
School	Slab
School	Internal walls
School	Technical equipment
External walls	Aluminium
External walls	Bio based
External walls	Concrete
External walls	Plastic
External walls	Insulation
External walls	Plaster
External walls	Paint
External walls	Mortar
Ventilation and cooling	Aluminium
Ventilation and cooling	Steel
Ventilation and cooling	Insulation
Heating systems	Aluminium
Heating systems	Plastic
Heating systems	Steel
Ground slab	Concrete
Ground slab	Steel
Roof	Concrete
Roof	Steel
Roof	Insulation
Roof	Bitumen
Beams and pillars	Concrete
Beams and pillars	Steel
Stairs and ramps	Bio based
Stairs and ramps	Concrete
Stairs and ramps	Steel
Windows, doors, glazing	Aluminium
Windows, doors, glazing	Plastic
Windows, doors, glazing	Glas
Water	Aluminium
Water	Steel
Slab	Bio based
Slab	Concrete
Slab	Plastic
Slab	Steel
Slab	Plaster
Slab	Paint
Slab	Mortar
Internal walls	Concrete
Internal walls	Glas
Internal walls	Paint
Internal walls	Mortar
Technical equipment	Steel
Technical equipment	Glas
Aluminium	Construction
Aluminium	Use
Bio based	Construction
Concrete	Construction
Plastic	Construction
Plastic	Use
Steel	Construction
Steel	Use
Insulation	Construction
Glas	Construction
Glas	Use
Plaster	Construction
Bitumen	Construction
Bitumen	Use
Paint	Construction
Mortar	Construction
Construction	Incineration
Construction	Recycled
Construction	Landfill
Use	Incineration
Use	Recycled
Retail	Beams and pillars
Retail	Roof
Retail	Ground slab
Retail	Heating systems
Retail	Ventilation and cooling
Retail	External walls
Retail	Stairs and ramps
Retail	Windows, doors, glazing
Retail	Water
Retail	Drainage
Retail	Slab
Retail	Foundation
Retail	Internal walls
External walls	Aluminium
External walls	Insulation
External walls	Paint
External walls	Mortar
External walls	Fired clay
Ventilation and cooling	Aluminium
Ventilation and cooling	Steel
Heating systems	Steel
Ground slab	Concrete
Ground slab	Plastic
Ground slab	Steel
Ground slab	Aggregate
Roof	Concrete
Roof	Plastic
Roof	Steel
Roof	Insulation
Roof	Bitumen
Roof	Paint
Beams and pillars	Bio based
Beams and pillars	Concrete
Beams and pillars	Steel
Stairs and ramps	Concrete
Stairs and ramps	Steel
Windows, doors, glazing	Aluminium
Windows, doors, glazing	Bio based
Windows, doors, glazing	Plastic
Windows, doors, glazing	Glas
Windows, doors, glazing	Paint
Water	Steel
Drainage	Plastic
Drainage	Zinc
Slab	Aluminium
Slab	Bio based
Slab	Concrete
Slab	Plastic
Slab	Steel
Slab	Glas
Slab	Mortar
Foundation	Concrete
Foundation	Plastic
Foundation	Steel
Internal walls	Aluminium
Internal walls	Concrete
Internal walls	Plastic
Internal walls	Steel
Internal walls	Insulation
Internal walls	Glas
Internal walls	Plaster
Internal walls	Paint
Internal walls	Mortar
Aluminium	Construction
Aluminium	Use
Bio based	Construction
Concrete	Construction
Plastic	Construction
Plastic	Use
Steel	Construction
Steel	Use
Insulation	Construction
Glas	Construction
Glas	Use
Plaster	Construction
Bitumen	Use
Paint	Construction
Paint	Use
Mortar	Construction
Fired clay	Construction
Zinc	Use
Aggregate	Construction
Construction	Incineration
Construction	Recycled
Construction	Landfill
Use	Incineration
Use	Recycled
Sport centre	Roof
Sport centre	Ground slab
Sport centre	Heating systems
Sport centre	Ventilation and cooling
Sport centre	External walls
Sport centre	Windows, doors, glazing
Sport centre	Water
Sport centre	Internal walls
Sport centre	Technical equipment
Sport centre	Drainage
Sport centre	Foundation
Sport centre	Slab
Sport centre	Beams and pillars
Sport centre	Stairs and ramps
External walls	Aluminium
External walls	Concrete
External walls	Plastic
External walls	Steel
External walls	Insulation
External walls	Paint
External walls	Mortar
External walls	Bitumen
Ventilation and cooling	Aluminium
Ventilation and cooling	Steel
Heating systems	Aluminium
Heating systems	Steel
Ground slab	Concrete
Ground slab	Steel
Ground slab	Insulation
Roof	Aluminium
Roof	Plastic
Roof	Insulation
Roof	Paint
Roof	Bitumen
Windows, doors, glazing	Aluminium
Windows, doors, glazing	Bio based
Windows, doors, glazing	Steel
Windows, doors, glazing	Glas
Windows, doors, glazing	Paint
Water	Steel
Internal walls	Bio based
Internal walls	Concrete
Internal walls	Plastic
Internal walls	Steel
Internal walls	Insulation
Internal walls	Glas
Internal walls	Plaster
Internal walls	Paint
Technical equipment	Steel
Technical equipment	Glas
Drainage	Plastic
Drainage	Steel
Drainage	Insulation
Drainage	Bitumen
Foundation	Concrete
Foundation	Steel
Slab	Bio based
Slab	Concrete
Slab	Steel
Slab	Insulation
Beams and pillars	Steel
Beams and pillars	Plaster
Stairs and ramps	Concrete
Stairs and ramps	Steel
Stairs and ramps	Paint
Stairs and ramps	Aggregate
Aluminium	Construction
Aluminium	Use
Bio based	Construction
Concrete	Construction
Plastic	Construction
Plastic	Use
Steel	Construction
Steel	Use
Insulation	Construction
Insulation	Use
Glas	Construction
Glas	Use
Plaster	Construction
Paint	Construction
Mortar	Construction
Bitumen	Construction
Bitumen	Use
Aggregate	Construction
Construction	Incineration
Construction	Recycled
Construction	Landfill
Use	Incineration
Use	Recycled
Use	Landfill
Cultural building	Internal walls
Cultural building	Beams and pillars
Cultural building	Roof
Cultural building	Ground slab
Cultural building	Heating systems
Cultural building	Ventilation and cooling
Cultural building	External walls
Cultural building	Slab
Cultural building	Stairs and ramps
Cultural building	Drainage
Cultural building	Technical equipment
Cultural building	Foundation
Cultural building	Windows, doors, glazing
External walls	Aluminium
External walls	Plastic
Ventilation and cooling	Aluminium
Heating systems	Aluminium
Heating systems	Plastic
Heating systems	Steel
Ground slab	Bio based
Ground slab	Insulation
Roof	Bio based
Roof	Insulation
Roof	Bitumen
Beams and pillars	Steel
Internal walls	Concrete
Internal walls	Steel
Internal walls	Insulation
Internal walls	Plaster
Slab	Bio based
Slab	Concrete
Slab	Plastic
Slab	Steel
Slab	Insulation
Stairs and ramps	Concrete
Stairs and ramps	Steel
Drainage	Plastic
Technical equipment	Glas
Foundation	Concrete
Foundation	Plastic
Foundation	Steel
Windows, doors, glazing	Aluminium
Windows, doors, glazing	Bio based
Windows, doors, glazing	Steel
Windows, doors, glazing	Glas
Aluminium	Construction
Aluminium	Use
Bio based	Construction
Bio based	Use
Concrete	Construction
Plastic	Construction
Plastic	Use
Steel	Construction
Steel	Use
Insulation	Construction
Glas	Use
Plaster	Construction
Bitumen	Use
Construction	Incineration
Construction	Recycled
Construction	Landfill
Use	Incineration
Use	Recycled
[truncated: 6 more columns]

## Sheet: F5. Rel. diff. in env. impacts
Figure 5 – Relative difference in environmental impact for a wood-based and a conventional pathway. In addition to the difference in total impact (total), the impacts are divided into upstream (life cycle stages A1-A3, A4, and A5) and downstream (B4, C3, and C4) impacts for the wood-based and conventional pathways, respectively.
Total
Impact category	Wood	Conventional	Indicator unit
GWP	1.04447e+09	2.03388e+09	t CO2 eq
ODP	12.9466	12.7341	t CFC11 eq
POCP	425004	850127	t Ethene eq
AP	3.02952e+06	4.62423e+06	t SO2 eq
EP	894093	871005	t PO43- eq
ADPE	48802.7	42350.8	t Sb eq
ADPF	1.60954e+10	2.05906e+10	MJ
PENRT	1.70915e+10	2.19089e+10	MJ
PERT	2.24498e+10	6.33611e+09	MJ
NRSF	1.91148e+08	5.18312e+08	MJ
RSF	1.23024e+08	3.62198e+08	MJ
Upstream
Impact category	Wood	Conventional	Indicator unit
GWP	-1.67602e+08	1.40285e+09	t CO2 eq
ODP	12.8495	12.1544	t CFC11 eq
POCP	338293	743561	t Ethene eq
AP	2.19448e+06	3.6396e+06	t SO2 eq
EP	686150	678188	t PO43- eq
ADPE	33358.9	32399.2	t Sb eq
ADPF	1.05278e+10	1.64871e+10	MJ
PENRT	1.13077e+10	1.75258e+10	MJ
PERT	1.80861e+10	7.65226e+09	MJ
NRSF	1.91148e+08	5.18214e+08	MJ
RSF	1.20705e+08	3.6218e+08	MJ
Downstram
Impact category	Wood	Conventional	Indicator unit
GWP	1.21207e+09	6.31033e+08	t CO2 eq
ODP	0.0971948	0.579758	t CFC11 eq
POCP	86711.1	106566	t Ethene eq
AP	835044	984625	t SO2 eq
EP	207943	192817	t PO43- eq
ADPE	15443.8	9951.64	t Sb eq
ADPF	5.56758e+09	4.10352e+09	MJ
PENRT	5.78376e+09	4.38315e+09	MJ
PERT	4.36376e+09	-1.31616e+09	MJ
NRSF	896.624	98016.8	MJ
RSF	2.31964e+06	18489.4	MJ

## Sheet: F6. CO2 flow data
Figure 6 – Flow diagram of expected climate impact (million (M) tons of CO2 eq) of new buildings in Denmark predicted for the period 2025 to 2050
Wood buidlings					Conventional buidlings
Building typology	From, wood	To, wood	Forecasted GWP, wood [kgco2eq]		From, conv	To, conv	Forecasted GWP, conv [kgCO2eq]
Single family	Single family	Drainage	2.94797e+06		Single family	Roof	6.29907e+07
Single family	Single family	Foundation	5.00281e+07		Single family	Ground slab	1.26458e+08
Single family	Single family	Internal walls	1.05367e+07		Single family	Heating systems	3.52488e+07
Single family	Single family	Roof	1.12826e+08		Single family	Ventilation and cooling	4.18511e+06
Single family	Single family	Ground slab	4.42895e+07		Single family	External walls	6.61041e+07
Single family	Single family	Water	1.64583e+07		Single family	Windows, doors, glazing	8.87533e+07
Single family	Single family	Heating systems	2.09008e+07		Single family	Water	7.81051e+06
Single family	Single family	Windows, doors, glazing	5.41806e+07		Single family	Internal walls	3.11605e+07
Single family	Single family	External walls	3.80187e+07		Single family	Technical equipment	1.31986e+08
Single family	External walls	Bio based	3.76143e+07		Single family	Drainage	3.46472e+06
Single family	External walls	Mortar	404452		Single family	Foundation	6.65655e+07
Single family	Windows, doors, glazing	Aluminium	8.16906e+06		External walls	Bio based	3.98082e+06
Single family	Windows, doors, glazing	Bio based	2.13351e+07		External walls	Concrete	1.88029e+07
Single family	Windows, doors, glazing	Glas	2.40418e+07		External walls	Plastic	162936
Single family	Windows, doors, glazing	Steel	634546		External walls	Insulation	7.53522e+06
Single family	Heating systems	Aluminium	1.89158e+07		External walls	Glas	965490
Single family	Heating systems	Plastic	1.98505e+06		External walls	Plaster	761982
Single family	Water	Plastic	2.71871e+06		External walls	Paint	422120
Single family	Water	Steel	1.37395e+07		External walls	Mortar	8.85537e+06
Single family	Ground slab	Bio based	1.37382e+07		External walls	Fired clay	2.46172e+07
Single family	Ground slab	Concrete	6.61574e+06		Ventilation and cooling	Aluminium	2.6039e+06
Single family	Ground slab	Insulation	2.15565e+07		Ventilation and cooling	Steel	1.58122e+06
Single family	Ground slab	Plastic	823257		Heating systems	Aluminium	7.94208e+06
Single family	Ground slab	Steel	1.12577e+06		Heating systems	Plastic	2.64629e+07
Single family	Ground slab	Fired clay	392005		Heating systems	Steel	843881
Single family	Ground slab	Clay	38002.6		Ground slab	Bio based	3.65484e+06
Single family	Roof	Bio based	4.19072e+07		Ground slab	Concrete	5.94698e+07
Single family	Roof	Bitumen	6.90173e+07		Ground slab	Plastic	1.84158e+06
Single family	Roof	Plastic	1.90167e+06		Ground slab	Steel	5.7405e+06
Single family	Internal walls	Bio based	1.02143e+07		Ground slab	Insulation	5.09431e+07
Single family	Internal walls	Mortar	322472		Ground slab	Glas	4.09136e+06
Single family	Foundation	Concrete	4.85275e+07		Ground slab	Mortar	716827
Single family	Foundation	Steel	1.50064e+06		Roof	Bio based	1.35505e+07
Single family	Drainage	Steel	2.94797e+06		Roof	Concrete	2.29844e+07
Single family	Aluminium	A1-A3	9.64097e+06		Roof	Plastic	1.17518e+07
Single family	Bio based	A1-A3	-3.37692e+08		Roof	Insulation	4.36791e+06
Single family	Bitumen	A1-A3	1.9597e+07		Roof	Plaster	3.59216e+06
Single family	Concrete	A1-A3	4.9311e+07		Roof	Paint	3.68338e+06
Single family	Glas	A1-A3	1.07712e+07		Roof	Mortar	3.0605e+06
Single family	Insulation	A1-A3	9.11548e+06		Windows, doors, glazing	Aluminium	2.48004e+07
Single family	Plastic	A1-A3	2.1029e+06		Windows, doors, glazing	Bio based	1.21505e+07
Single family	Steel	A1-A3	9.7979e+06		Windows, doors, glazing	Glas	5.17437e+07
Single family	Mortar	A1-A3	505329		Windows, doors, glazing	Paint	58626.2
Single family	Fired clay	A1-A3	124159		Water	Steel	7.81051e+06
Single family	Clay	A1-A3	3053.04		Internal walls	Concrete	2.61878e+07
Single family	Aluminium	A4	127360		Internal walls	Glas	339046
Single family	Bio based	A4	3.13221e+07		Internal walls	Paint	2.42229e+06
Single family	Bitumen	A4	1.25563e+06		Internal walls	Mortar	2.21131e+06
Single family	Concrete	A4	1.42316e+06		Technical equipment	Glas	1.31986e+08
Single family	Glas	A4	267669		Drainage	Plastic	3.46472e+06
Single family	Insulation	A4	140289		Foundation	Concrete	6.16761e+07
Single family	Plastic	A4	26812.1		Foundation	Steel	4.88941e+06
Multifamily	External walls	Plaster	3.04911e+06		Multi family	Internal walls	7.7284e+07
Multifamily	Windows, doors, glazing	Aluminium	764102		Multi family	Beams and pillars	2.2105e+06
Multifamily	Windows, doors, glazing	Bio based	2.34861e+06		Multi family	Roof	3.35687e+07
Multifamily	Windows, doors, glazing	Glas	2.29243e+07		Multi family	Ground slab	7.05797e+07
Multifamily	Windows, doors, glazing	Paint	25069.1		Multi family	Heating systems	279171
Multifamily	Ventilation and cooling	Aluminium	1.00062e+06		Multi family	Ventilation and cooling	4.98112e+06
Multifamily	Ventilation and cooling	Steel	2.03013e+06		Multi family	External walls	1.35384e+08
Multifamily	Heating systems	Steel	2.71833e+06		Multi family	Slab	1.18329e+08
Multifamily	Ground slab	Concrete	1.09184e+07		Multi family	Stairs and ramps	6.86957e+06
Multifamily	Ground slab	Insulation	2.25896e+07		Multi family	Technical equipment	1.53517e+07
Multifamily	Ground slab	Steel	5.58903e+06		Multi family	Foundation	3.31469e+07
Multifamily	Roof	Bio based	1.82094e+06		Multi family	Windows, doors, glazing	2.87258e+07
Multifamily	Roof	Bitumen	1.25201e+07		Multi family	Balconies	1.90351e+07
Multifamily	Roof	Insulation	7.65102e+06		External walls	Aluminium	1.23344e+07
Multifamily	Roof	Paint	1.96213e+06		External walls	Concrete	4.44072e+07
Multifamily	Roof	Plaster	6.30918e+06		External walls	Plastic	44268.4
Multifamily	Roof	Plastic	859451		External walls	Steel	1.03602e+07
Multifamily	Internal walls	Concrete	4.52295e+06		External walls	Insulation	3.87905e+07
Multifamily	Internal walls	Glas	652097		External walls	Plaster	403204
Multifamily	Internal walls	Steel	2.80348e+06		External walls	Fired clay	2.9044e+07
Multifamily	Internal walls	Mortar	166442		Ventilation and cooling	Aluminium	4.98112e+06
Multifamily	Foundation	Concrete	1.87432e+07		Heating systems	Aluminium	279171
Multifamily	Foundation	Insulation	1.12571e+06		Ground slab	Concrete	3.47178e+07
Multifamily	Foundation	Steel	6.03257e+06		Ground slab	Plastic	2.33579e+07
Multifamily	Technical equipment	Glas	7.41994e+07		Ground slab	Steel	2.60562e+06
Multifamily	Drainage	Steel	204733		Ground slab	Insulation	9.89836e+06
Multifamily	Balconies	Steel	2.4344e+07		Roof	Aluminium	2.7976e+06
Multifamily	Other	Aluminium	1.40207e+07		Roof	Bio based	1.44031e+06
Multifamily	Slab	Bio based	9.82087e+06		Roof	Concrete	310256
Multifamily	Slab	Insulation	4.08061e+06		Roof	Steel	526462
Multifamily	Slab	Paint	3.3839e+06		Roof	Insulation	2.4117e+07
Multifamily	Slab	Plaster	3.71525e+06		Roof	Plaster	619646
Multifamily	Slab	Plastic	1.34697e+06		Roof	Bitumen	3.75743e+06
Multifamily	Slab	Steel	3.82158e+06		Beams and pillars	Concrete	1.93185e+06
Multifamily	Stairs and ramps	Bio based	1.18615e+06		Beams and pillars	Steel	278655
Multifamily	Stairs and ramps	Steel	7.90142e+06		Internal walls	Concrete	6.48385e+07
Multifamily	Aluminium	A1-A3	1.32167e+07		Internal walls	Steel	9.33601e+06
Multifamily	Bio based	A1-A3	-2.08251e+08		Internal walls	Insulation	34499.6
Multifamily	Bitumen	A1-A3	3.55499e+06		Internal walls	Plaster	88096.9
Multifamily	Concrete	A1-A3	3.69014e+07		Internal walls	Paint	2.98693e+06
Multifamily	Glas	A1-A3	4.63204e+07		Slab	Bio based	118244
Multifamily	Insulation	A1-A3	4.26061e+07		Slab	Concrete	8.88135e+07
Multifamily	Paint	A1-A3	2.6349e+06		Slab	Plastic	1.30857e+07
Multifamily	Plaster	A1-A3	7.80728e+06		Slab	Steel	9.34681e+06
Multifamily	Plastic	A1-A3	668176		Slab	Insulation	6.03743e+06
Multifamily	Steel	A1-A3	4.61832e+07		Slab	Glas	837081
Multifamily	Mortar	A1-A3	128623		Slab	Mortar	89888.9
Multifamily	Aluminium	A4	58748.4		Stairs and ramps	Bio based	8341.9
Multifamily	Bio based	A4	1.43194e+07		Stairs and ramps	Concrete	1.98706e+06
Multifamily	Bitumen	A4	227778		Stairs and ramps	Steel	1.18623e+06
Multifamily	Concrete	A4	1.6189e+06		Stairs and ramps	Aggregate	3.68794e+06
Multifamily	Glas	A4	310472		Foundation	Concrete	3.17369e+07
Multifamily	Insulation	A4	1.21079e+06		Foundation	Steel	1.40994e+06
Multifamily	Paint	A4	53184.3		Windows, doors, glazing	Aluminium	1.35264e+07
Multifamily	Plaster	A4	1.57641e+06		Windows, doors, glazing	Bio based	74758.5
Multifamily	Plastic	A4	12723.9		Windows, doors, glazing	Steel	87934.6
Multifamily	Steel	A4	1.41273e+06		Windows, doors, glazing	Glas	1.4952e+07
Multifamily	Mortar	A4	16621.2		Windows, doors, glazing	Plaster	84694.6
Multifamily	Aluminium	A5	1.35885e+06		Balconies	Steel	1.90351e+07
Multifamily	Bio based	A5	2.97825e+06		Technical equipment	Glas	1.53517e+07
Office	Bio based	B4	344189		Office	Beams and pillars	6.42255e+07
Office	Concrete	B4	0		Office	Roof	2.44035e+07
Office	Glas	B4	7.25836e+06		Office	Ground slab	2.81851e+07
Office	Paint	B4	1684.84		Office	Heating systems	1.37296e+07
Office	Plastic	B4	0		Office	Ventilation and cooling	1.26211e+07
Office	Bio based	C3	2.23186e+08		Office	External walls	3.8365e+07
Office	Concrete	C3	2.68172e+06		Office	Stairs and ramps	3.65689e+06
Office	Glas	C3	359347		Office	Windows, doors, glazing	2.18732e+07
Office	Paint	C3	0		Office	Water	614630
Office	Plastic	C3	2.91911e+06		Office	Drainage	1.41798e+07
Office	Bio based	C4	0		Office	Balconies	376146
Office	Concrete	C4	1.98243e+06		Office	Slab	2.37316e+08
Office	Glas	C4	58150.1		Office	Technical equipment	3.75406e+07
Office	Paint	C4	81.583		Office	Foundation	1.24233e+07
Office	Plastic	C4	0		Office	Internal walls	7.38113e+07
Day care	Day care	Drainage	112310		External walls	Aluminium	6.28654e+06
Day care	Day care	Technical equipment	3.0021e+06		External walls	Concrete	7.03386e+06
Day care	Day care	Foundation	2.06418e+06		External walls	Plastic	148967
Day care	Day care	Internal walls	1.43204e+06		External walls	Steel	8.56054e+06
Day care	Day care	Beams and pillars	560597		External walls	Insulation	4.41884e+06
Day care	Day care	Roof	1.83269e+07		External walls	Plaster	845194
Day care	Day care	Ground slab	2.85382e+06		External walls	Paint	928847
Day care	Day care	Water	118523		External walls	Mortar	1.78111e+06
Day care	Day care	Heating systems	1.44798e+06		External walls	Fired clay	8.36115e+06
Day care	Day care	Ventilation and cooling	690943		Ventilation and cooling	Aluminium	3.10202e+06
Day care	Day care	Windows, doors, glazing	2.53873e+06		Ventilation and cooling	Steel	9.51911e+06
Day care	Day care	External walls	1.41179e+06		Heating systems	Aluminium	916677
Day care	External walls	Bio based	173903		Heating systems	Steel	1.2813e+07
Day care	External walls	Insulation	741418		Ground slab	Concrete	1.05879e+07
Day care	External walls	Paint	171779		Ground slab	Plastic	1.58894e+07
Day care	External walls	Plaster	280523		Ground slab	Steel	1.70783e+06
Day care	External walls	Plastic	44162.9		Roof	Bio based	1.82929e+06
Day care	Windows, doors, glazing	Aluminium	951333		Roof	Insulation	1.74529e+07
Day care	Windows, doors, glazing	Bio based	245566		Roof	Bitumen	5.12129e+06
Day care	Windows, doors, glazing	Glas	1.33828e+06		Beams and pillars	Concrete	4.08381e+07
Day care	Windows, doors, glazing	Paint	3549.9		Beams and pillars	Steel	2.33874e+07
Day care	Ventilation and cooling	Aluminium	355517		Stairs and ramps	Concrete	2.83225e+06
Day care	Ventilation and cooling	Steel	335426		Stairs and ramps	Steel	824645
Day care	Heating systems	Aluminium	104974		Windows, doors, glazing	Aluminium	9.4325e+06
Day care	Heating systems	Insulation	5330.48		Windows, doors, glazing	Bio based	268079
Day care	Heating systems	Plastic	932641		Windows, doors, glazing	Plastic	3.34156e+06
Day care	Heating systems	Steel	405031		Windows, doors, glazing	Steel	555934
Day care	Water	Aluminium	2153.17		Windows, doors, glazing	Glas	8.18169e+06
Day care	Water	Insulation	29317.6		Windows, doors, glazing	Paint	93443
Day care	Water	Plastic	87052.7		Water	Steel	614630
Day care	Ground slab	Bio based	39525.1		Drainage	Plastic	1.41798e+07
Day care	Ground slab	Concrete	1.87675e+06		Balconies	Steel	376146
Day care	Ground slab	Insulation	276447		Slab	Bio based	3.10199e+06
Day care	Ground slab	Plastic	197068		Slab	Concrete	1.56773e+08
Day care	Ground slab	Steel	464024		Slab	Plastic	6.93585e+07
Day care	Roof	Bio based	1.00436e+07		Slab	Steel	1.21926e+06
Day care	Roof	Bitumen	1.72452e+06		Slab	Insulation	6.21171e+06
Day care	Roof	Insulation	5.27316e+06		Slab	Paint	196190
Day care	Roof	Plaster	297499		Slab	Mortar	62884.7
Day care	Roof	Steel	988119		Slab	Fired clay	392285
Day care	Beams and pillars	Bio based	144499		Technical equipment	Steel	8.99902e+06
Day care	Beams and pillars	Steel	416099		Technical equipment	Glas	2.85416e+07
Day care	Internal walls	Bio based	66751		Foundation	Concrete	1.04354e+07
Day care	Internal walls	Glas	64026.8		Foundation	Steel	1.98797e+06
Day care	Internal walls	Insulation	348072		Internal walls	Bio based	1274.8
Day care	Internal walls	Paint	628934		Internal walls	Concrete	4.21524e+07
Day care	Internal walls	Plaster	300729		Internal walls	Plastic	171427
Day care	Internal walls	Plastic	12312		Internal walls	Steel	1.46569e+07
Day care	Internal walls	Mortar	11217.8		Internal walls	Insulation	2.75744e+06
Day care	Foundation	Concrete	1.97196e+06		Internal walls	Plaster	8.26946e+06
Day care	Foundation	Insulation	10949.6		Internal walls	Paint	5.54818e+06
Day care	Foundation	Steel	81266.4		Internal walls	Mortar	35123.9
Day care	Technical equipment	Glas	3.0021e+06		Internal walls	Fired clay	219109
School	School	Roof	1.50763e+07		Day care	Internal walls	1.75732e+06
School	School	Ground slab	2.18053e+07		Day care	Beams and pillars	813087
School	School	Windows, doors, glazing	1.32667e+07		Day care	Roof	2.74286e+06
School	School	External walls	5.56113e+06		Day care	Ground slab	1.20261e+06
School	School	Slab	7.17995e+06		Day care	Heating systems	1.33364e+06
School	School	Stairs and ramps	137456		Day care	Ventilation and cooling	1.27498e+06
School	External walls	Bio based	2.3965e+06		Day care	External walls	5.4595e+06
School	External walls	Concrete	25642.7		Day care	Slab	4.08869e+06
School	External walls	Insulation	1.55991e+06		Day care	Stairs and ramps	1.52821e+06
School	External walls	Plaster	366545		Day care	Stairs and ramps	2.51225e+06
School	External walls	Plastic	92445.3		Day care	Windows, doors, glazing	1.97403e+06
School	External walls	Steel	1.12008e+06		Day care	Water	221862
School	Windows, doors, glazing	Aluminium	2.46556e+06		External walls	Bio based	494449
School	Windows, doors, glazing	Bio based	1.61785e+06		External walls	Concrete	1.07144e+06
School	Windows, doors, glazing	Glas	7.51115e+06		External walls	Steel	650108
School	Windows, doors, glazing	Paint	19495.6		External walls	Insulation	889573
School	Windows, doors, glazing	Plastic	1.65264e+06		External walls	Plaster	242302
School	Ground slab	Bio based	203581		External walls	Paint	80423.3
School	Ground slab	Concrete	1.34339e+07		External walls	Mortar	1.08978e+06
School	Ground slab	Insulation	1.15822e+06		External walls	Fired clay	941417
School	Ground slab	Plastic	2.15662e+06		Ventilation and cooling	Aluminium	449184
School	Ground slab	Steel	4.85293e+06		Ventilation and cooling	Steel	825797
School	Roof	Bitumen	7.03223e+06		Heating systems	Aluminium	15337.5
School	Roof	Insulation	7.50858e+06		Heating systems	Steel	1.3183e+06
School	Roof	Plaster	21916.8		Ground slab	Concrete	647047
School	Roof	Plastic	513546		Ground slab	Plastic	28476.8
School	Beams and pillars	Bio based	4.15812e+06		Ground slab	Steel	82529.2
School	Beams and pillars	Steel	3.87843e+06		Ground slab	Insulation	444559
School	Internal walls	Concrete	1.04467e+06		Roof	Aluminium	69198.2
School	Internal walls	Glas	876.296		Roof	Bio based	161867
School	Internal walls	Insulation	584015		Roof	Concrete	780455
School	Internal walls	Paint	991323		Roof	Plastic	322832
School	Internal walls	Plaster	1.16736e+06		Roof	Steel	86265.9
School	Internal walls	Steel	2.32526e+06		Roof	Insulation	738387
School	Internal walls	Mortar	35906		Roof	Bitumen	427013
School	Foundation	Concrete	5.02342e+06		Roof	Copper	156844
School	Foundation	Steel	1.80853e+06		Beams and pillars	Concrete	597809
School	Technical equipment	Glas	3.88804e+06		Beams and pillars	Steel	215278
School	Slab	Bio based	1.83496e+06		Internal walls	Bio based	61427.7
School	Slab	Concrete	470525		Internal walls	Concrete	573480
School	Slab	Insulation	1.02079e+06		Internal walls	Steel	400222
School	Slab	Paint	16767.6		Internal walls	Insulation	103889
School	Slab	Plaster	726082		Internal walls	Plaster	157486
School	Slab	Steel	3.11083e+06		Internal walls	Paint	131497
School	Stairs and ramps	Bio based	117158		Internal walls	Mortar	329315
School	Stairs and ramps	Steel	20298.1		Slab	Bio based	430923
School	Aluminium	A1-A3	1.72213e+06		Slab	Concrete	3.45289e+06
School	Bio based	A1-A3	-2.55134e+07		Slab	Plastic	56184.4
School	Bitumen	A1-A3	1.99675e+06		Slab	Insulation	148693
School	Concrete	A1-A3	1.60062e+07		Stairs and ramps	Bio based	57909.2
School	Glas	A1-A3	5.18045e+06		Stairs and ramps	Steel	1.4703e+06
School	Insulation	A1-A3	9.4753e+06		Foundation	Concrete	2.26467e+06
School	Paint	A1-A3	258689		Foundation	Steel	247586
School	Plaster	A1-A3	1.58933e+06		Windows, doors, glazing	Aluminium	563218
School	Plastic	A1-A3	1.17415e+06		Windows, doors, glazing	Bio based	212914
School	Steel	A1-A3	1.38453e+07		Windows, doors, glazing	Glas	1.19789e+06
School	Mortar	A1-A3	27747.3		Water	Aluminium	3128.34
School	Aluminium	A4	9448.57		Water	Plastic	81692.1
School	Bio based	A4	498393		Water	Steel	137041
Retail	Ventilation and cooling	Aluminium	526970		School	Beams and pillars	1.4807e+07
Retail	Water	Steel	79834.8		School	Roof	2.26253e+07
Retail	Ground slab	Concrete	1.29864e+06		School	Ground slab	2.00501e+07
Retail	Ground slab	Plastic	2.79791e+06		School	Heating systems	5.77777e+06
Retail	Ground slab	Steel	167371		School	Ventilation and cooling	9.91892e+06
Retail	Roof	Bio based	21453.5		School	External walls	1.19065e+07
Retail	Roof	Bitumen	2.96312e+06		School	Stairs and ramps	1.79332e+06
Retail	Roof	Insulation	40138.1		School	Windows, doors, glazing	8.8188e+06
Retail	Roof	Steel	808942		School	Water	254471
Retail	Beams and pillars	Bio based	272069		School	Slab	3.14989e+07
Retail	Beams and pillars	Steel	339639		School	Internal walls	1.36777e+07
Retail	Internal walls	Insulation	90025.5		School	Technical equipment	3.77288e+06
Retail	Internal walls	Plaster	120557		External walls	Aluminium	9.66145e+06
Retail	Internal walls	Plastic	137061		External walls	Bio based	584818
Retail	Internal walls	Steel	286758		External walls	Concrete	888941
Retail	Internal walls	Mortar	3343.66		External walls	Plastic	82102
Retail	Internal walls	Fired clay	18474.5		External walls	Insulation	266370
Retail	Foundation	Concrete	388854		External walls	Plaster	318896
Retail	Foundation	Plastic	64081.1		External walls	Paint	91816.4
Retail	Foundation	Mortar	30944.5		External walls	Mortar	12064
Retail	Technical equipment	Glas	7.81354e+06		Ventilation and cooling	Aluminium	3.30155e+06
Retail	Drainage	Steel	24550.6		Ventilation and cooling	Steel	6.61737e+06
Retail	Other	Aluminium	0		Ventilation and cooling	Insulation	3.49257
Retail	Other	Bio based	2816.88		Heating systems	Aluminium	144769
Retail	Other	Bitumen	16413.8		Heating systems	Plastic	391996
Retail	Other	Steel	1574.01		Heating systems	Steel	5.24101e+06
Retail	Slab	Bio based	72205.1		Ground slab	Concrete	1.45434e+07
Retail	Slab	Concrete	181509		Ground slab	Steel	5.50671e+06
Retail	Slab	Plaster	18827		Roof	Concrete	1.02264e+07
Retail	Slab	Steel	13950.7		Roof	Steel	3.87213e+06
Retail	Slab	Mortar	44723.6		Roof	Insulation	6.70201e+06
Retail	Aluminium	A1-A3	1.43692e+06		Roof	Bitumen	1.82481e+06
Retail	Bio based	A1-A3	-2.10866e+06		Beams and pillars	Concrete	4.22993e+06
Retail	Bitumen	A1-A3	926071		Beams and pillars	Steel	1.0577e+07
Retail	Concrete	A1-A3	1.80458e+06		Stairs and ramps	Bio based	78261.3
Retail	Glas	A1-A3	4.09124e+06		Stairs and ramps	Concrete	406080
Retail	Insulation	A1-A3	156102		Stairs and ramps	Steel	1.30898e+06
Retail	Paint	A1-A3	526.103		Windows, doors, glazing	Aluminium	1.07691e+06
Retail	Plaster	A1-A3	189135		Windows, doors, glazing	Plastic	800929
Retail	Plastic	A1-A3	1.27219e+06		Windows, doors, glazing	Glas	6.94096e+06
Retail	Steel	A1-A3	1.46758e+06		Water	Aluminium	827.189
Retail	Mortar	A1-A3	54750.6		Water	Steel	253644
Retail	Fired clay	A1-A3	888160		Slab	Bio based	160206
Retail	Aluminium	A4	8141.37		Slab	Concrete	2.00549e+07
Retail	Bio based	A4	41789.3		Slab	Plastic	775442
Retail	Bitumen	A4	58614.1		Slab	Steel	1.02305e+07
Retail	Concrete	A4	82797.1		Slab	Plaster	23344.6
Retail	Glas	A4	16949.3		Slab	Paint	12930.3
Retail	Insulation	A4	4561.58		Slab	Mortar	241609
Retail	Paint	A4	9.00077		Internal walls	Concrete	4.82739e+06
Retail	Plaster	A4	30822.5		Internal walls	Glas	8.31152e+06
Retail	Plastic	A4	19635.2		Internal walls	Paint	157676
Retail	Steel	A4	59455.9		Internal walls	Mortar	381160
Retail	Mortar	A4	12835.5		Technical equipment	Steel	217294
Retail	Fired clay	A4	127845		Technical equipment	Glas	3.55558e+06
Sport centre	Roof	Bitumen	3.09668e+06		Retail	Beams and pillars	736918
Sport centre	Roof	Insulation	10389.5		Retail	Roof	7.34064e+06
Sport centre	Roof	Plastic	77812.5		Retail	Ground slab	6.24274e+06
Sport centre	Beams and pillars	Bio based	1.33444e+06		Retail	Heating systems	46959.8
Sport centre	Internal walls	Bio based	48092.2		Retail	Ventilation and cooling	1.74964e+06
Sport centre	Internal walls	Insulation	29410.3		Retail	External walls	29184.4
Sport centre	Foundation	Concrete	1.43322e+06		Retail	Stairs and ramps	327745
Sport centre	Foundation	Insulation	87000.5		Retail	Windows, doors, glazing	1.93739e+06
Sport centre	Drainage	Steel	76715.5		Retail	Water	30989.6
Sport centre	Aluminium	A1-A3	211126		Retail	Drainage	159442
Sport centre	Bio based	A1-A3	-1.0595e+07		Retail	Slab	2.12164e+06
Sport centre	Bitumen	A1-A3	881558		Retail	Foundation	3.50328e+06
Sport centre	Concrete	A1-A3	5.6098e+06		Retail	Internal walls	2.17053e+06
Sport centre	Glas	A1-A3	1.2069e+06		External walls	Aluminium	22239.8
Sport centre	Insulation	A1-A3	70937.1		External walls	Insulation	1062
Sport centre	Paint	A1-A3	559.323		External walls	Paint	4832.28
Sport centre	Plastic	A1-A3	1.34634e+06		External walls	Mortar	180.655
Sport centre	Steel	A1-A3	1.61843e+06		External walls	Fired clay	869.692
Sport centre	Aluminium	A4	1442.73		Ventilation and cooling	Aluminium	1.01878e+06
Sport centre	Bio based	A4	282330		Ventilation and cooling	Steel	730867
Sport centre	Bitumen	A4	55265.9		Heating systems	Steel	46959.8
Sport centre	Concrete	A4	153787		Ground slab	Concrete	2.5027e+06
Sport centre	Glas	A4	28105.1		Ground slab	Plastic	2.0675e+06
Sport centre	Insulation	A4	1565.19		Ground slab	Steel	588155
Sport centre	Paint	A4	9.56912		Ground slab	Aggregate	1.08439e+06
Sport centre	Plastic	A4	10607.9		Roof	Concrete	1.26669e+06
Sport centre	Steel	A4	102446		Roof	Plastic	88654.5
Sport centre	Aluminium	A5	33460.8		Roof	Steel	2.15616e+06
Sport centre	Bio based	A5	120249		Roof	Insulation	3.20355e+06
Sport centre	Bitumen	A5	103459		Roof	Bitumen	548144
Sport centre	Concrete	A5	300727		Roof	Paint	77440.7
Sport centre	Glas	A5	130866		Beams and pillars	Bio based	377817
Sport centre	Insulation	A5	11527.3		Beams and pillars	Concrete	10957
Sport centre	Paint	A5	57.2094		Beams and pillars	Steel	348144
Sport centre	Plastic	A5	213626		Stairs and ramps	Concrete	162929
Sport centre	Steel	A5	172243		Stairs and ramps	Steel	164816
Sport centre	Aluminium	B4	333166		Windows, doors, glazing	Aluminium	1.75761e+06
Sport centre	Bio based	B4	294208		Windows, doors, glazing	Bio based	18152
Sport centre	Bitumen	B4	1.95864e+06		Windows, doors, glazing	Plastic	54551.8
Sport centre	Concrete	B4	0		Windows, doors, glazing	Steel	0.011654
Sport centre	Glas	B4	1.28056e+06		Windows, doors, glazing	Glas	106757
Sport centre	Insulation	B4	0		Windows, doors, glazing	Paint	313.079
Sport centre	Paint	B4	0		Water	Steel	30989.6
Sport centre	Plastic	B4	0		Drainage	Plastic	149488
Sport centre	Steel	B4	0		Drainage	Zinc	9954.16
Sport centre	Aluminium	C3	64379.7		Slab	Aluminium	58542.5
Sport centre	Bio based	C3	1.24162e+07		Slab	Bio based	46307.8
Sport centre	Bitumen	C3	0		Slab	Concrete	1.46671e+06
Sport centre	Concrete	C3	144268		Slab	Plastic	140852
Sport centre	Glas	C3	63397.8		Slab	Steel	8184.7
Sport centre	Insulation	C3	612.515		Slab	Glas	377575
Sport centre	Paint	C3	0		Slab	Mortar	23473.7
Sport centre	Plastic	C3	779309		Foundation	Concrete	3.21353e+06
Sport centre	Steel	C3	0		Foundation	Plastic	97713.5
Sport centre	Aluminium	C4	57660		Foundation	Steel	192036
Sport centre	Bio based	C4	0		Internal walls	Aluminium	119097
Sport centre	Bitumen	C4	97761.3		Internal walls	Concrete	1.36092e+06
Sport centre	Concrete	C4	106682		Internal walls	Plastic	104096
Sport centre	Glas	C4	10259.1		Internal walls	Steel	157299
Sport centre	Insulation	C4	42158.2		Internal walls	Insulation	19523.5
Sport centre	Paint	C4	3.2019		Internal walls	Glas	12065.4
Sport centre	Plastic	C4	0		Internal walls	Plaster	140631
Sport centre	Steel	C4	1558.16		Internal walls	Paint	247339
Cultural building	Cultural building	Drainage	30323		Internal walls	Mortar	9555.05
Cultural building	Slab	Steel	571944		Sport centre	Roof	1.19122e+07
Cultural building	Other	Bio based	33473.9		Sport centre	Ground slab	1.10539e+07
Cultural building	Other	Concrete	0		Sport centre	Heating systems	663916
Cultural building	Other	Paint	26427.3		Sport centre	Ventilation and cooling	989100
Cultural building	Other	Plastic	230937		Sport centre	External walls	1.07077e+07
Cultural building	Other	Steel	263686		Sport centre	Windows, doors, glazing	1.24285e+06
Cultural building	Drainage	Steel	30323		Sport centre	Water	30194.5
Cultural building	Aggregate	A1-A3	721.801		Sport centre	Internal walls	2.74561e+06
Cultural building	Aluminium	A1-A3	2.23984e+06		Sport centre	Technical equipment	492487
Cultural building	Bio based	A1-A3	-4.83672e+06		Sport centre	Drainage	80746.7
Cultural building	Bitumen	A1-A3	367522		Sport centre	Foundation	1.00908e+06
Cultural building	Concrete	A1-A3	3.49233e+06		Sport centre	Slab	7.9984e+06
Cultural building	Fired clay	A1-A3	383197		Sport centre	Beams and pillars	6.45642e+06
Cultural building	Glas	A1-A3	2.02702e+06		Sport centre	Stairs and ramps	1.72983e+06
Cultural building	Insulation	A1-A3	2.64813e+06		External walls	Aluminium	2.20795e+06
Cultural building	Mortar	A1-A3	34975		External walls	Concrete	2.67388e+06
Cultural building	Paint	A1-A3	102449		External walls	Plastic	44246.7
Cultural building	Plaster	A1-A3	509620		External walls	Steel	3.00453e+06
Cultural building	Plastic	A1-A3	300439		External walls	Insulation	2.32278e+06
Cultural building	Steel	A1-A3	4.90143e+06		External walls	Paint	442547
Cultural building	Zinc	A1-A3	1916.48		External walls	Mortar	6471.77
Cultural building	Aggregate	A4	11341.8		External walls	Bitumen	5260.69
Cultural building	Aluminium	A4	13737.4		Ventilation and cooling	Aluminium	709624
Cultural building	Bio based	A4	145441		Ventilation and cooling	Steel	279477
Cultural building	Bitumen	A4	25093.3		Heating systems	Aluminium	75217.3
Cultural building	Concrete	A4	217805		Heating systems	Steel	588699
Cultural building	Fired clay	A4	58523.4		Ground slab	Concrete	3.81441e+06
Cultural building	Glas	A4	51335.5		Ground slab	Steel	579453
Cultural building	Insulation	A4	26706.1		Ground slab	Insulation	6.66002e+06
Cultural building	Mortar	A4	13801.2		Roof	Aluminium	555907
Cultural building	Paint	A4	1936.31		Roof	Plastic	178556
Cultural building	Plaster	A4	143077		Roof	Insulation	9.94552e+06
Cultural building	Plastic	A4	3558.31		Roof	Paint	6202.48
Cultural building	Steel	A4	140621		Roof	Bitumen	1.22604e+06
Cultural building	Zinc	A4	41.1217		Windows, doors, glazing	Aluminium	634973
Cultural building	Aggregate	A5	1376.46		Windows, doors, glazing	Bio based	43367
Cultural building	Aluminium	A5	230303		Windows, doors, glazing	Steel	92146.8
Cultural building	Bio based	A5	85978.5		Windows, doors, glazing	Glas	471608
Cultural building	Bitumen	A5	43715.6		Windows, doors, glazing	Paint	753.695
Cultural building	Concrete	A5	233299		Water	Steel	30194.5
Cultural building	Fired clay	A5	45129.6		Internal walls	Bio based	79366.1
Cultural building	Glas	A5	217953		Internal walls	Concrete	230250
Cultural building	Insulation	A5	201621		Internal walls	Plastic	1.36475e+06
Cultural building	Mortar	A5	5380.7		Internal walls	Steel	380711
Cultural building	Paint	A5	10917.8		Internal walls	Insulation	244067
Cultural building	Plaster	A5	70063.2		Internal walls	Glas	58749.5
Cultural building	Plastic	A5	51472.9		Internal walls	Plaster	295266
Cultural building	Steel	A5	371423		Internal walls	Paint	92448.8
Cultural building	Zinc	A5	195.822		Technical equipment	Steel	6814.75
Cultural building	Aggregate	B4	0		Technical equipment	Glas	485672
Cultural building	Aluminium	B4	809155		Drainage	Plastic	53093.4
Cultural building	Bio based	B4	154321		Drainage	Steel	4096.19
Cultural building	Bitumen	B4	761569		Drainage	Insulation	23167.5
Cultural building	Concrete	B4	0		Drainage	Bitumen	389.491
Cultural building	Fired clay	B4	0		Foundation	Concrete	951077
Cultural building	Glas	B4	2.08981e+06		Foundation	Steel	58002.6
Cultural building	Insulation	B4	10337.5		Slab	Bio based	2.1991e+06
Cultural building	Mortar	B4	0		Slab	Concrete	3.34223e+06
Cultural building	Paint	B4	326371		Slab	Steel	1.8361e+06
Cultural building	Plaster	B4	2411.15		Slab	Insulation	620986
Cultural building	Plastic	B4	24103.5		Beams and pillars	Steel	6.42838e+06
Cultural building	Steel	B4	425302		Beams and pillars	Plaster	28043.4
Cultural building	Zinc	B4	0		Stairs and ramps	Concrete	564741
Cultural building	Aggregate	C3	1701.02		Stairs and ramps	Steel	1.02471e+06
Cultural building	Aluminium	C3	39417		Stairs and ramps	Paint	14400
Cultural building	Bio based	C3	6.13596e+06		Stairs and ramps	Aggregate	125974
					Cultural building	Internal walls	3.76072e+06
					Cultural building	Beams and pillars	3.72391e+06
					Cultural building	Roof	2.75034e+06
					Cultural building	Ground slab	751546
					Cultural building	Heating systems	72478.9
					Cultural building	Ventilation and cooling	147039
					Cultural building	External walls	1.58583e+06
					Cultural building	Slab	3.78405e+06
					Cultural building	Stairs and ramps	31144.1
					Cultural building	Drainage	158670
					Cultural building	Technical equipment	4.99441e+06
					Cultural building	Foundation	1.2756e+06
					Cultural building	Windows, doors, glazing	3.73e+06
					External walls	Aluminium	389.739
					External walls	Plastic	1.58544e+06
					Ventilation and cooling	Aluminium	147039
					Heating systems	Aluminium	43600.6
					Heating systems	Plastic	9526.99
					Heating systems	Steel	19351.3
					Ground slab	Bio based	10037.1
					Ground slab	Insulation	741509
					Roof	Bio based	1.3133e+06
					Roof	Insulation	1.25529e+06
					Roof	Bitumen	181754
					Beams and pillars	Steel	3.72391e+06
					Internal walls	Concrete	1.14232e+06
					Internal walls	Steel	981282
					Internal walls	Insulation	550734
					Internal walls	Plaster	1.08638e+06
					Slab	Bio based	78915.3
					Slab	Concrete	2.24284e+06
					Slab	Plastic	869129
					Slab	Steel	239403
					Slab	Insulation	353762
					Stairs and ramps	Concrete	80.5636
					Stairs and ramps	Steel	31063.6
					Drainage	Plastic	158670
					Technical equipment	Glas	4.99441e+06
					Foundation	Concrete	1036.66
					Foundation	Plastic	115652
					Foundation	Steel	1.15891e+06
					Windows, doors, glazing	Aluminium	1.66598e+06
					Windows, doors, glazing	Bio based	21753.8
					Windows, doors, glazing	Steel	5120.61
					Windows, doors, glazing	Glas	2.03715e+06

## Sheet: F7. Impacts from materials
Figure 7 – Comparison of impact differences across material categories for the impact categories with the largest variance between wood-based and conventional construction pathways
Impact category and pathway type	Bio based	Mortar	Aluminium	Glas	Steel	Plastic	Concrete	Insulation	Fired clay	Clay	Bitumen	Paint	Plaster	Zinc	Aggregate	Copper
GWP, wood	2.34053e+08	1.07869e+06	5.36696e+07	1.6833e+08	1.04672e+08	2.62472e+07	2.24337e+08	1.05839e+08	2.02904e+06	38002.6	9.76128e+07	9.28132e+06	1.72606e+07	2154.05	15141	0
GWP, conv	4.66098e+07	1.89066e+07	1.13305e+08	2.85539e+08	2.34415e+08	1.92883e+08	8.18029e+08	2.078e+08	6.3576e+07	0	1.30921e+07	1.77006e+07	1.69568e+07	9954.16	4.8983e+06	156844
POCP, wood	55595	-78.3623	12433	44745.7	29807.8	17039.4	14510.2	217881	-116.986	-22.7368	29568.2	3961.93	-310.427	0.168003	-9.29335	0
POCP, conv	0.544986	2427.07	23944.6	86648.5	68456.6	219072	2573.22	402297	2147.3	0	8469.07	7091.26	-1107.13	0.866648	-2228.14	36.5543
AP, wood	936213	1521.58	188903	640372	249115	42983.1	391987	308240	2961.5	105.794	207304	28756	31001.4	12.2186	44.3897	0
AP, conv	213436	28474.3	358328	1.04682e+06	586985	277854	1.29775e+06	597622	74978.1	0	29383.8	64901.3	34796.8	56.7894	12199.7	638.431
ADPF, wood	3.6687e+09	6.5949e+06	5.89235e+08	1.91618e+09	1.11224e+09	3.73844e+08	1.44036e+09	1.41146e+09	3.01336e+07	522800	5.03122e+09	1.94163e+08	3.20567e+08	616.978	207455	0
ADPF, conv	6.24411e+08	1.33665e+08	1.26796e+09	3.26057e+09	2.59512e+09	2.79721e+09	4.95972e+09	2.57732e+09	9.4811e+08	0	7.09271e+08	3.41646e+08	3.07859e+08	1530.23	6.62392e+07	1.54171e+06
PERT	2.0986e+10	1.4229e+06	1.49367e+08	3.76806e+08	2.63634e+08	4.13389e+07	2.1686e+08	1.28427e+08	2.19075e+06	30921.6	1.58176e+08	2.26167e+07	1.02913e+08	1419.61	16760.5	0
PERT	2.61871e+09	2.4118e+07	3.74653e+08	7.14332e+08	7.49637e+08	2.43277e+08	1.1244e+09	2.57356e+08	6.79639e+07	0	2.15094e+07	4.89589e+07	8.17209e+07	6545.54	9.17015e+06	285333

## Sheet: F8. Comparison of studies
Figure 8 - Climate impact for the 8 wood-based and 8 conventional building cases compared to the average in climate impact for the same building types found in Tozan et al. (2023).
	This study's climate impact	Tozan et al. (2023), average, embodied CO2
Cultural building, conventional	9.44424	9.43214
Cultural building, wood	9.47123	9.43214
Sports centre, conventional	9.32613	9.43214
Sports centre, wood	3.22071	9.43214
Retail, conventional	9.69209	9.43214
Retail, wood	8.74654	9.43214
School, conventional	9.65196	10.6814
School, wood	5.85723	10.6814
Day care, conventional	7.84603	8.48522
Day care, wood	10.8859	8.48522
Office, conventional	10.1702	8.8107
Office, wood	2.36435	8.8107
Multi family, conventional	8.17825	8.40167
Multi family, wood	5.48152	8.40167
Single family, conventional	11.0833	7.4521
Single family, wood	6.21266	7.4521
Reference for Tozan et al. (2023)
Tozan, B., Olsen, C. O., Sørensen, C. G., Kragh, J., Rose, J., Aggerholm, S., & Birgisdóttir, H. (2023). Climate impact from new construction - analytical basis for establishing a new LCA-based limit value for buildings’ climate impact from 2025 (in Danish: Klimapåvirkning fra nybyggeri - analytisk grundlag til fastlæggelse af ny LCA baseret grænseværdi for bygningers klimapåvirkning fra 2025).

## Sheet: F9. EPD information
	Supplementary Material F9: EPDs used for products in the buildings in the wooden pathway.
	EPD no./declaration no.	Issued	Building product name	Building product type	Building element	Standard	A5 - waste rates [%]
	MD-20008 EN_rev2	31-02-2021	WISA Spruce Plywood Uncoated	Plywood		EN15804+A1	0.05
	MD-20002 EN	2020-04-22	Sawn and dried construction wood products of pine and spruce	Construction wood			0.05
	MD-20005-EN_rev1	2021-05-17	Glulam construction wood products of pine and spruce	Glulam			0.05
	MD-20006-EN	2021-06-21	Recycled particle boards	Particle boards			0.05
	MD-20033-EN	2020-09-21	Frøslev Heatwood	Wood cladding			0.05
	MD-22076-EN	2022-09-30	Planed construction wood products	Construction wood			0.05
	MD-20007-EN-rev1	2021-05-17	Cross laminated timber	Construction wood			0.05
	EPD-RWI-20200018-CBD6-EN	2022-08-26	Rockfon Blanka Ceiling Tile	Acoustic stone wool			0.1
	MD-20011-DA_rev1	2021-03-15	Ready mixed concrete exposure classes C20-25 and C25-30 SCC	Ready mix concrete	Slab, floor deck		0.05
	MD-20012-DA_rev1	2021-03-15	Ready mixed concrete exposure classes C30-37 and C35-45 SCC	Ready mix concrete	Foundation		0.05
	MD-20023-DA_rev1	2021-03-15	Lightweight concrete block	Lightweight concrete block			0.05
	EPD-KNI-20160071-CBA1-EN	2016-05-30	Urbanscape extensive green roof system	Sedum green roof			0.1
	gen_dk database	2023		All other building products			0.1
